# Supplementary material for: Dipoid-Specific Genome Stability Genes of S. cerevisiae: Genomic Screen Reveals Haploidization as an Escape from Persisting DNA Rearrangement Stress
Source: PLOS journal article supplement (doi:10.1371/journal.pone.0021124), 2011-06-17
Supplement: S3 (10.1371/journal.pone.0021124.s003) [file journal.pone.0021124.s003]

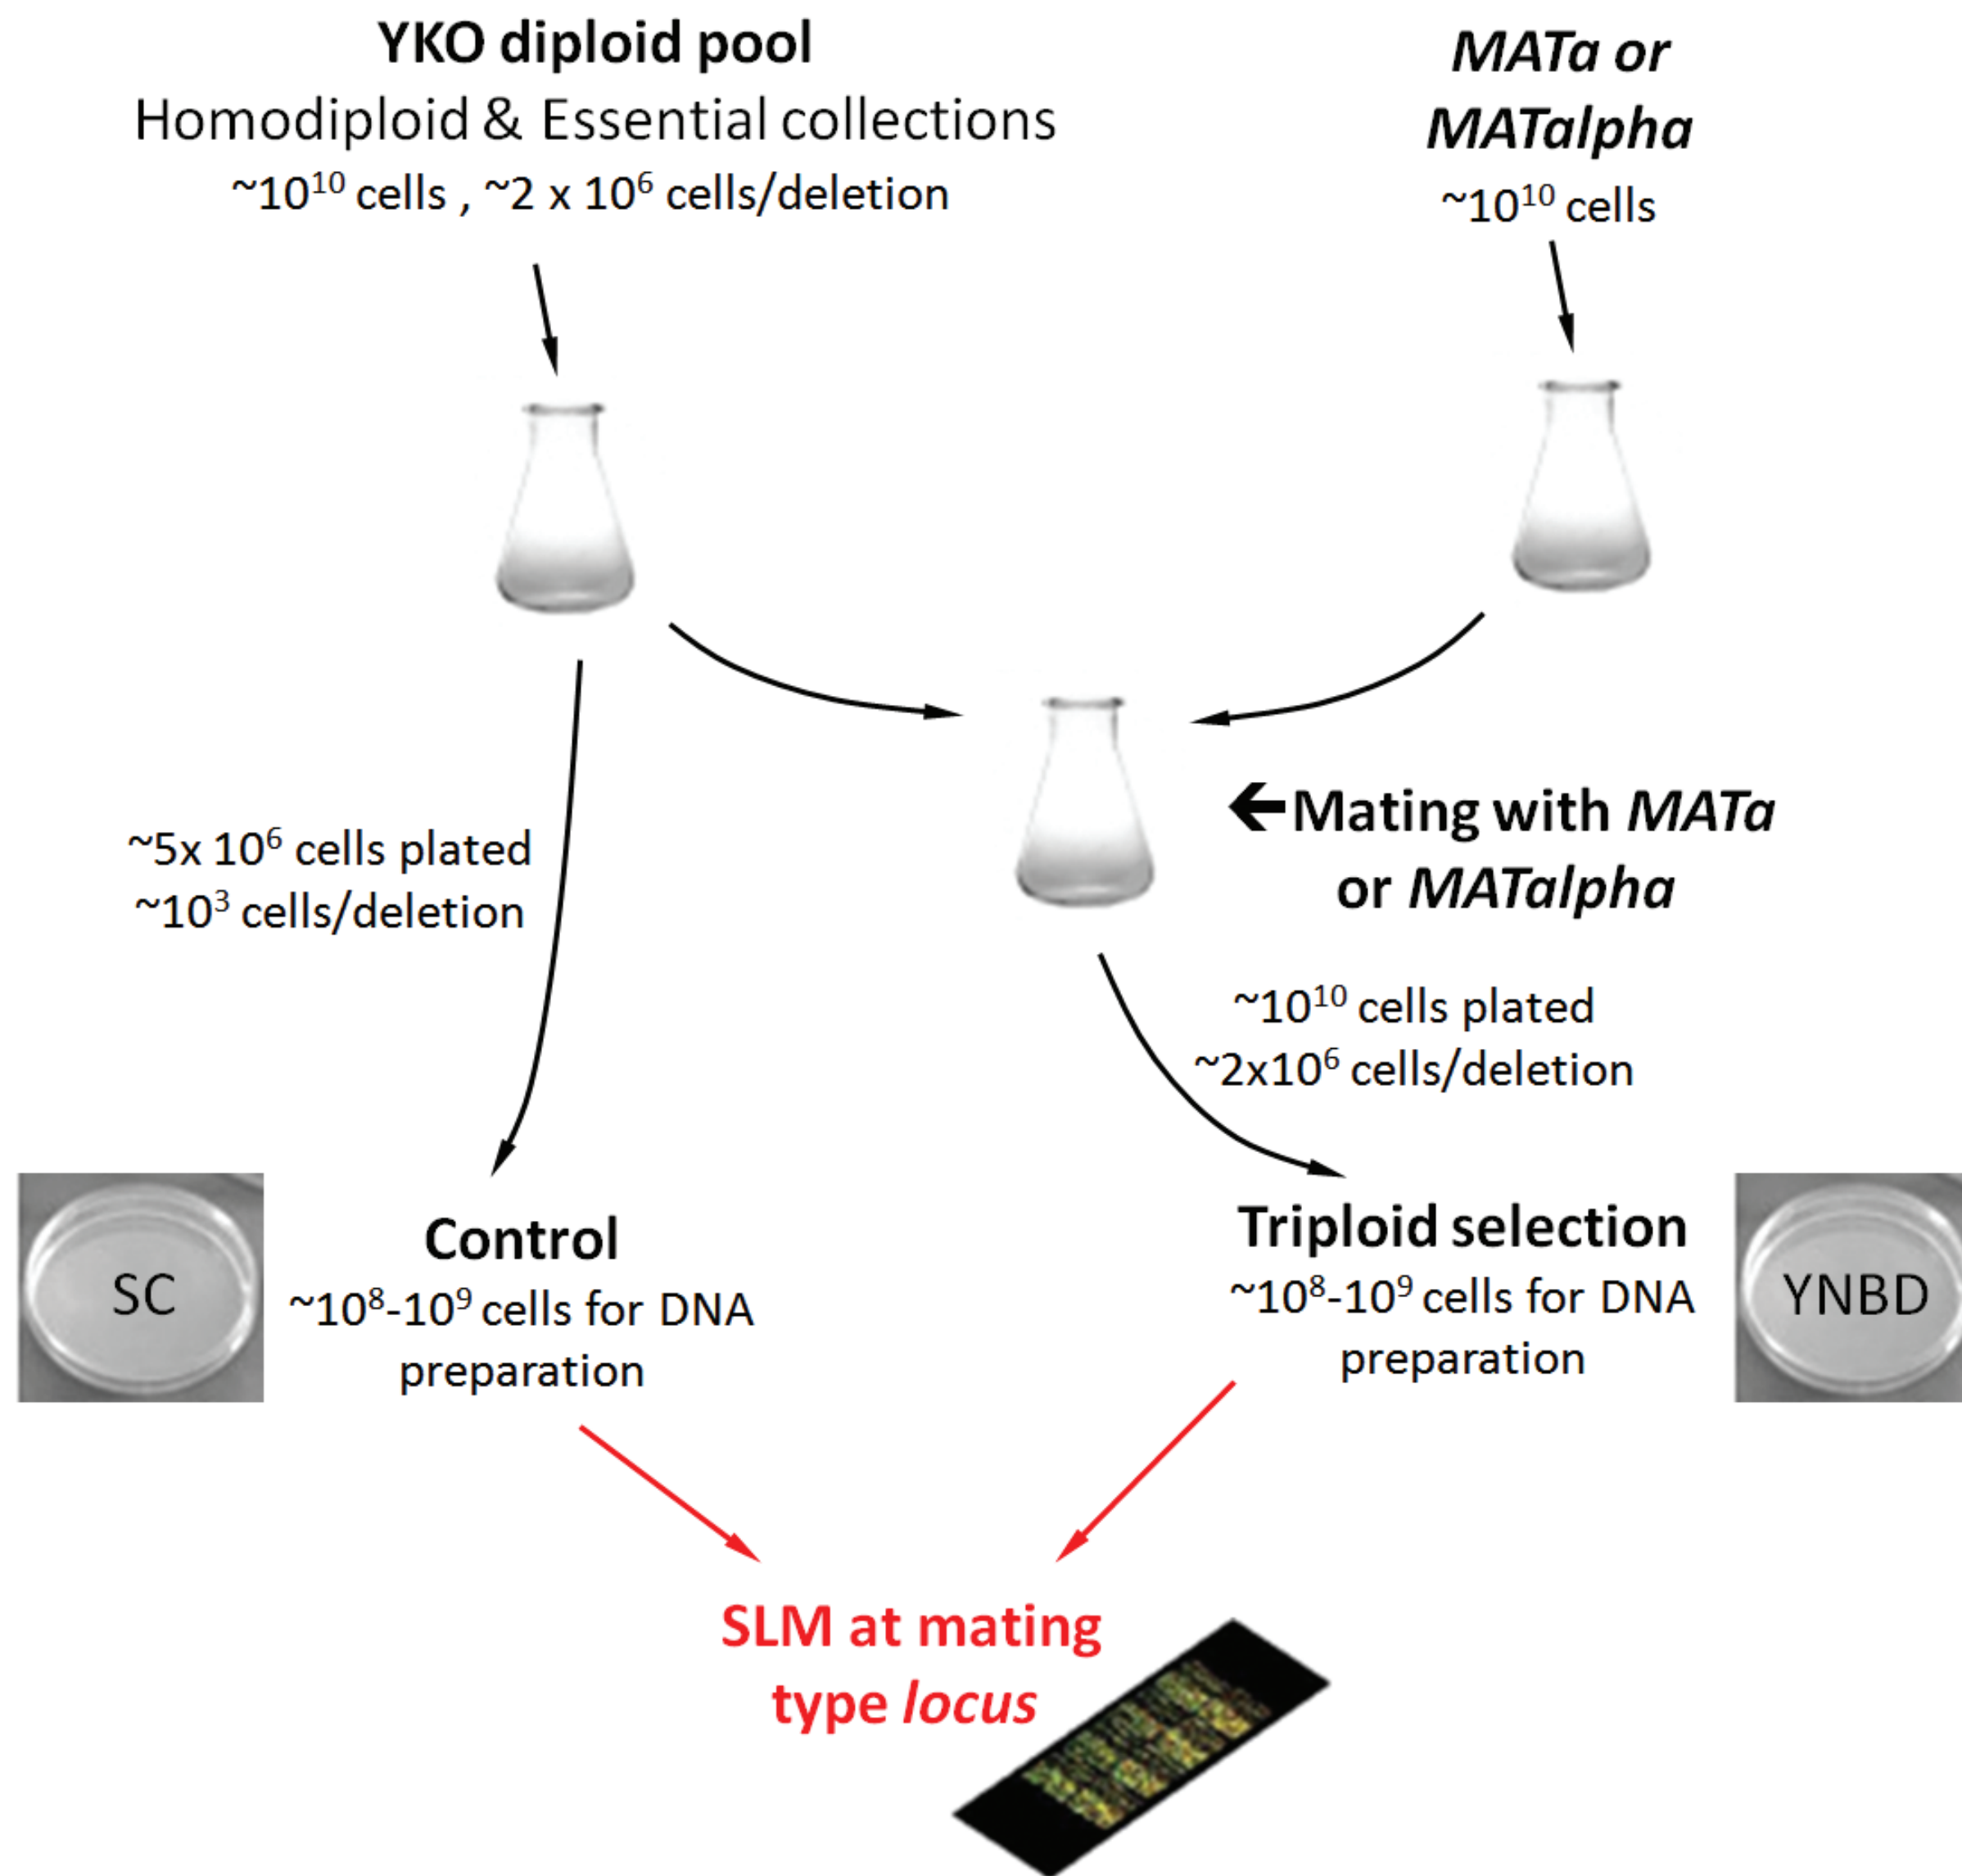

**Figure S3.** The strategy of microarray-based genome-wide screen for SLM at *MATa*/*MATα* loci.
