# Supplementary material for: Dipoid-Specific Genome Stability Genes of S. cerevisiae: Genomic Screen Reveals Haploidization as an Escape from Persisting DNA Rearrangement Stress
Source: PLOS journal article supplement (doi:10.1371/journal.pone.0021124), 2011-06-17
Supplement: S9 (10.1371/journal.pone.0021124.s009) [file journal.pone.0021124.s009]

Table S1. Summary of results of all three large scale SLM screens.

|    |                                                                                                                                                                                                                                                                                                                               | Strains with p-val<0.1 |              | Strains with significant LogRatio |              | Strains with p-val<0.1 and significant LogRatio |             |
|----|-------------------------------------------------------------------------------------------------------------------------------------------------------------------------------------------------------------------------------------------------------------------------------------------------------------------------------|------------------------|--------------|-----------------------------------|--------------|-------------------------------------------------|-------------|
|    |                                                                                                                                                                                                                                                                                                                               | Strain count           | % of total*  | Strain count                      | % of total*  | Strain count                                    | % of total* |
| 1  | Strains with elevated SLM at <i>CAN1 locus</i> (LogRatio SLM <i>CAN1</i> > 2)                                                                                                                                                                                                                                                 | 4610                   | 80,74        | 1250                              | 21,89        | 748                                             | 13,10       |
| 2  | Strains with elevated SLM at <i>URA3 locus</i> (LogRatio SLM <i>URA3</i> > 2)                                                                                                                                                                                                                                                 | 2115                   | 37,04        | 2670                              | 46,76        | 998                                             | 17,48       |
| 3  | Strains with elevated SLM at both <i>loci CAN1</i> and <i>URA3</i> [(LogRatio SLM <i>CAN1</i> > 2) AND (LogRatio SLM <i>URA3</i> > 2)]                                                                                                                                                                                        | <b>1694</b>            | <b>29,67</b> | <b>757</b>                        | <b>13,26</b> | <b>158</b>                                      | <b>2,77</b> |
| 4  | Strains which mate as <i>MATa</i> (LogRatio cross with <i>MATa</i> > 1)                                                                                                                                                                                                                                                       | 5089                   | 89,12        | 637                               | 11,16        | 458                                             | 8,02        |
| 5  | Strains which mate as <i>MATα</i> (LogRatio cross with <i>MATa</i> > 1)                                                                                                                                                                                                                                                       | 4894                   | 85,71        | 693                               | 12,14        | 351                                             | 6,15        |
| 6  | Strains which mate with <i>MATa</i> or <i>MATα</i> [(LogRatio cross with <i>MATa</i> > 1) OR (LogRatio cross with <i>MATa</i> > 1)]                                                                                                                                                                                           | 4563                   | 79,91        | 825                               | 14,45        | 637                                             | 11,16       |
| 7  | Strains with elevated SLM at <i>URA3 locus</i> , which mate with <i>MATα</i> or <i>MATa</i> , but with slight if any SLM at <i>CAN1 locus</i> ,<br>{[(LogRatio SLM <i>URA3</i> > 2) AND [(LogRatio cross with <i>MATα</i> > 1) OR (LogRatio cross with <i>MATa</i> > 1)] AND [LogRatio SLM <i>CAN1</i> < 2]}                  | <b>1442</b>            | <b>25,25</b> | <b>264</b>                        | <b>4,62</b>  | <b>74</b>                                       | <b>1,30</b> |
| 8  | Strains with elevated SLM at <i>CAN1 locus</i> which mate with <i>MATα</i> or <i>MATa</i> , but slight if any SLM at <i>URA3 locus</i> , <b>might be haploid</b><br>{[(LogRatio SLM <i>CAN1</i> > 2) AND [(LogRatio cross with <i>MATα</i> > 1) OR (LogRatio cross with <i>MATa</i> > 1)] AND [LogRatio SLM <i>URA3</i> < 2]} | <b>1442</b>            | <b>25,25</b> | <b>97</b>                         | <b>1,70</b>  | <b>17</b>                                       | <b>0,30</b> |
| 9  | Strains with elevated SLM at both <i>loci CAN1</i> and <i>URA3</i> , or with elevated SLM at <i>CAN1</i> or <i>URA3 loci</i> , which mate with <i>MATα</i> or <i>MATa</i> ; <b>potential mutator strains</b> (3 OR 7 OR 8)                                                                                                    | <b>1694</b>            | <b>29,67</b> | <b>1118</b>                       | <b>19,58</b> | <b>249</b>                                      | <b>4,36</b> |
| 10 | Strains with significant signal in all experiments, <b>mutators</b><br>{[(LogRatio SLM <i>CAN1</i> > 2) AND (LogRatio SLM <i>URA3</i> > 2)] AND [(LogRatio cross with <i>MATα</i> > 1) OR (LogRatio cross with <i>MATa</i> > 1)]}                                                                                             | <b>1442</b>            | <b>25,25</b> | <b>146</b>                        | <b>2,56</b>  | <b>21</b>                                       | <b>0,37</b> |

\*) – Relative to total number of 5710 strains included in the analysis.
