# Supplementary material for: Dipoid-Specific Genome Stability Genes of S. cerevisiae: Genomic Screen Reveals Haploidization as an Escape from Persisting DNA Rearrangement Stress
Source: PLOS journal article supplement (doi:10.1371/journal.pone.0021124), 2011-06-17
Supplement: S10 (10.1371/journal.pone.0021124.s010) [file journal.pone.0021124.s010]

Table S2. 249 strains with elevated SLM at both *CAN1* and *URA3 loci*, or with elevated SLM at *CAN1* or *URA3 locus* that mate with *MATα* or *MATa*; potential mutator strains. Strains in particular groups are listed in order of decreasing phenotype intensity. The descriptions of genes with two most prevalent cellular localizations, nuclear and mitochondrial, are highlighted in green and yellow respectively.

Strains with significant signal in all experiments, **mutators**

{{(LogRatio SLM *CAN1* >2 ) AND (LogRatio SLM *URA3* > 2)} AND [(LogRatio cross with *MATα* > 1) OR (LogRatio cross with *MATa* > 1)]}

| ORF            | Name           | SLM at <i>CAN1 locus</i> |       | SLM at <i>URA3 locus</i> |       | cross with <i>MATα</i> |       | cross with <i>MATa</i> |       | Description as in SGD                                                                                                                                                                                                                            | Localization              | Status          | Collection  | Instability phenotypes | Genotoxic stress sensitivity                                | Other genome related phenotypes |
|----------------|----------------|--------------------------|-------|--------------------------|-------|------------------------|-------|------------------------|-------|--------------------------------------------------------------------------------------------------------------------------------------------------------------------------------------------------------------------------------------------------|---------------------------|-----------------|-------------|------------------------|-------------------------------------------------------------|---------------------------------|
|                |                | LogR                     | p-val | LogR                     | p-val | LogR                   | p-val | LogR                   | p-val |                                                                                                                                                                                                                                                  |                           |                 |             |                        |                                                             |                                 |
| <i>YGL236C</i> | <i>MTO1</i>    | 12,721                   | 0,000 | 6,079                    | 0,093 | 6,403                  | 0,000 | -3,226                 | 0,000 | Mitochondrial protein, forms a heterodimer complex with Mss1p that performs the 5-carboxymethylaminomethyl modification of the wobble uridine base in mitochondrial tRNAs; required for respiration in paromomycin-resistant 15S rRNA mutants    | mitochondrion             | Verified        | Homodiploid | RMCD, mtCM             |                                                             | SPO*                            |
| <i>YMR078C</i> | <i>CTF18</i>   | 12,493                   | 0,001 | 5,627                    | 0,004 | 5,293                  | 0,000 | -2,245                 | 0,061 | Subunit of a complex with Ctf8p that shares some subunits with Replication Factor C and is required for sister chromatid cohesion; may have overlapping functions with Rad24p in the DNA damage replication checkpoint                           | nucleus                   | Verified        | Homodiploid | ALF, CM, CSA, CS, TL   | HU, MMS, Phleomycin, Camptothecin, Bleomycin A2, Cisplatin, | SPO*, Benomyl                   |
| <i>YDR281C</i> | <i>PHM6</i>    | 12,129                   | 0,000 | 2,010                    | 0,053 | 5,582                  | 0,002 | -3,847                 | 0,040 | Protein of unknown function, expression is regulated by phosphate levels                                                                                                                                                                         | vacuole                   | Verified        | Homodiploid | RMCD                   |                                                             | SPO*                            |
| <i>YIL039W</i> | <i>TED1</i>    | 11,652                   | 0,000 | 5,129                    | 0,000 | 5,954                  | 0,000 | -3,837                 | 0,000 | Conserved phosphoesterase domain-containing protein that acts together with Emp24p/Erv25p in cargo exit from the ER; deletion confers sensitivity to 4-(N-(S-glutathionylacetyl)amino) phenylarsenoxide (GSAO)                                   | Endoplasmic Reticulum     | Uncharacterized | Homodiploid |                        |                                                             | SPO*                            |
| <i>YLR137W</i> | <i>YLR137W</i> | 9,806                    | 0,000 | 3,392                    | 0,048 | -5,429                 | 0,000 | 3,706                  | 0,000 | Putative protein of unknown function                                                                                                                                                                                                             | unknown                   | Uncharacterized | Homodiploid |                        |                                                             |                                 |
| <i>YBR078W</i> | <i>ECM33</i>   | 9,589                    | 0,093 | 2,077                    | 0,045 | 1,681                  | 0,000 | -3,175                 | 0,001 | GPI-anchored protein of unknown function, has a possible role in apical bud growth; GPI-anchoring on the plasma membrane crucial to function; phosphorylated in mitochondria; similar to Sps2p and Pst1p                                         | mitochondrion             | Verified        | Homodiploid | RMCD                   | Doxorubicin                                                 |                                 |
| <i>YJR037W</i> | <i>YJR037W</i> | 9,046                    | 0,003 | 2,619                    | 0,095 | 3,573                  | 0,000 | -5,194                 | 0,000 | Dubious open reading frame unlikely to encode a protein, based on available experimental and comparative sequence data; partially overlaps verified gene HUL4/YJR036C; deletion mutant has decreased spore survival in Drosophila feces          | unknown                   | Dubious         | Homodiploid |                        |                                                             |                                 |
| <i>YML042W</i> | <i>CAT2</i>    | 7,032                    | 0,000 | 2,794                    | 0,070 | 4,343                  | 0,000 | -4,789                 | 0,000 | Carnitine acetyl-CoA transferase present in both mitochondria and peroxisomes, transfers activated acetyl groups to carnitine to form acetylcarnitine which can be shuttled across membranes                                                     | mitochondrion, peroxisome | Verified        | Homodiploid |                        |                                                             |                                 |
| <i>YER175C</i> | <i>TMT1</i>    | 6,746                    | 0,003 | 4,216                    | 0,045 | 2,744                  | 0,000 | -3,920                 | 0,000 | Trans-aconitate methyltransferase, cytosolic enzyme that catalyzes the methyl esterification of 3-isopropylmalate, an intermediate of the leucine biosynthetic pathway, and trans-aconitate, which inhibits the citric acid cycle                | cytoplasm                 | Verified        | Homodiploid |                        |                                                             |                                 |
| <i>YIL066C</i> | <i>RNR3</i>    | 6,406                    | 0,001 | 3,042                    | 0,044 | 2,949                  | 0,000 | 4,476                  | 0,000 | One of two large regulatory subunits of ribonucleotide-diphosphate reductase; the RNR complex catalyzes rate-limiting step in dNTP synthesis, regulated by DNA replication and DNA damage checkpoint pathways via localization of small subunits | mitochondrion, cytoplasm  | Verified        | Homodiploid |                        | Tirapazamine                                                |                                 |
| <i>YDR334W</i> | <i>SWR1</i>    | 4,010                    | 0,018 | 2,631                    | 0,007 | 2,560                  | 0,000 | -6,000                 | 0,000 | Swi2/Snf2-related ATPase that is the structural component of the SWR1 complex, which exchanges histone variant H2AZ (Htz1p) for chromatin-bound histone H2A                                                                                      | nucleus                   | Verified        | Homodiploid | BIM                    | HU                                                          | Benomyl                         |
| <i>YOR311C</i> | <i>HSD1</i>    | 4,002                    | 0,065 | 3,463                    | 0,075 | 2,968                  | 0,000 | -4,687                 | 0,000 | Diacylglycerol kinase, localized to the endoplasmic reticulum (ER); overproduction induces enlargement of ER-like membrane structures and suppresses a temperature-sensitive sly1 mutation; contains a CTP transferase domain                    | Endoplasmic Reticulum     | Verified        | Homodiploid |                        |                                                             |                                 |
| <i>YNL032W</i> | <i>SIW14</i>   | 3,920                    | 0,004 | 7,242                    | 0,002 | 1,523                  | 0,000 | -3,299                 | 0,000 | Tyrosine phosphatase that plays a role in actin filament organization and endocytosis; localized to the cytoplasm                                                                                                                                | cytoplasm                 | Verified        | Homodiploid | TL                     |                                                             |                                 |
| <i>YOL087C</i> | <i>YOL087C</i> | 3,649                    | 0,005 | 6,076                    | 0,055 | -2,273                 | 0,001 | 2,853                  | 0,000 | Putative protein of unknown function; green fluorescent protein (GFP)-fusion protein localizes to the cytoplasm; deletion mutant is sensitive to various chemicals including phenanthroline, sanguinarine, and nordihydroguaiaretic acid         | cytoplasm                 | Uncharacterized | Homodiploid |                        |                                                             |                                 |

|                |                |       |       |       |       |        |       |        |       |                                                                                                                                                                                                                                       |                        |                 |             |      |    |     |
|----------------|----------------|-------|-------|-------|-------|--------|-------|--------|-------|---------------------------------------------------------------------------------------------------------------------------------------------------------------------------------------------------------------------------------------|------------------------|-----------------|-------------|------|----|-----|
| <i>YCL014W</i> | <i>BUD3</i>    | 3,621 | 0,002 | 2,222 | 0,048 | 1,647  | 0,001 | -3,141 | 0,000 | Protein involved in bud-site selection and required for axial budding pattern; localizes with septins to bud neck in mitosis and may constitute an axial landmark for next round of budding                                           | bud neck               | Verified        | Homodiploid |      |    |     |
| <i>YNR065C</i> | <i>YNR065C</i> | 3,264 | 0,051 | 2,539 | 0,025 | 1,138  | 0,000 | -2,210 | 0,000 | Protein of unknown function; protein-protein interactions suggest a possible role in actin patch formation; YNR065C is not an essential gene                                                                                          | actin path             | Uncharacterized | Homodiploid |      |    |     |
| <i>YGL091C</i> | <i>NBP35</i>   | 3,025 | 0,067 | 3,036 | 0,072 | -3,664 | 0,000 | 1,690  | 0,033 | Essential iron-sulfur cluster binding protein localized in the cytoplasm; forms a complex with Cfd1p that is involved in iron-sulfur protein assembly in the cytosol; similar to P-loop NTPases                                       | cytoplasm              | Verified        | Essential   |      |    |     |
| <i>YBL096C</i> | <i>YBL096C</i> | 2,482 | 0,001 | 3,806 | 0,090 | -4,425 | 0,000 | 1,260  | 0,000 | Non-Essential protein of unknown function                                                                                                                                                                                             | unknown                | Dubious         | Homodiploid |      |    |     |
| <i>YNL076W</i> | <i>MKS1</i>    | 2,380 | 0,001 | 3,543 | 0,016 | 2,160  | 0,000 | -0,577 | 0,026 | Pleiotropic negative transcriptional regulator involved in Ras-CAMP and lysine biosynthetic pathways and nitrogen regulation; involved in retrograde (RTG) mitochondria-to-nucleus signaling                                          | nucleus, mitochondrion | Verified        | Homodiploid |      | HU | CCP |
| <i>YDR067C</i> | <i>YDR067C</i> | 2,378 | 0,001 | 6,168 | 0,019 | -5,538 | 0,000 | 2,589  | 0,000 | Cytoplasmic protein required for replication of Brome mosaic virus in <i>S. cerevisiae</i> , which is a model system for studying replication of positive-strand RNA viruses in their natural hosts                                   | cytoplasm              | Uncharacterized | Homodiploid |      |    |     |
| <i>YKL160W</i> | <i>ELF1</i>    | 2,358 | 0,007 | 5,029 | 0,025 | 4,944  | 0,000 | -3,594 | 0,000 | Transcription elongation factor that contains a conserved zinc finger domain; implicated in the maintenance of proper chromatin structure in actively transcribed regions; deletion inhibits Brome mosaic virus (BMV) gene expression | nucleus                | Verified        | Homodiploid | TE-T |    |     |

Strains with elevated SLM at both CAN1 and URA3 loci

[(LogRatio SLM CAN1 > 2) AND (LogRatio SLM URA3 > 2)]

| ORF            | Name         | SLM at <i>CAN1</i> locus |       | SLM at <i>URA3</i> locus |       | cross with <i>MATalpha</i> |       | cross with <i>MATa</i> |       | Description                                                                                                                                                                                                                               | Localization          | Status   | Collection  | Instability phenotypes | Genotoxic stress sensitivity | Other genome related phenotypes |
|----------------|--------------|--------------------------|-------|--------------------------|-------|----------------------------|-------|------------------------|-------|-------------------------------------------------------------------------------------------------------------------------------------------------------------------------------------------------------------------------------------------|-----------------------|----------|-------------|------------------------|------------------------------|---------------------------------|
|                |              | LogR                     | p-val | LogR                     | p-val | LogR                       | p-val | LogR                   | p-val |                                                                                                                                                                                                                                           |                       |          |             |                        |                              |                                 |
| <i>YNL099C</i> | <i>OCA1</i>  | 3,493                    | 0,014 | 7,453                    | 0,006 | -2,259                     | 0,009 | -2,374                 | 0,018 | Putative protein tyrosine phosphatase, required for cell cycle arrest in response to oxidative damage of DNA                                                                                                                              | nucleus               | Verified | Homodiploid |                        |                              |                                 |
| <i>YJR002W</i> | <i>MPP10</i> | 2,458                    | 0,003 | 7,433                    | 0,078 | -4,301                     | 0,001 | -3,263                 | 0,000 | Component of the SSU processome and 90S preribosome, required for pre-18S rRNA processing, interacts with and controls the stability of Imp3p and Imp4p, Essential for viability; similar to human Mpp10p                                 | nucleolus             | Verified | Essential   |                        |                              |                                 |
| <i>YDR265W</i> | <i>PEX10</i> | 4,228                    | 0,024 | 6,821                    | 0,091 | -5,115                     | 0,000 | -6,009                 | 0,000 | Peroxisomal membrane E3 ubiquitin ligase required for for Ubc4p-dependent Pex5p ubiquitination and peroxisomal matrix protein import; contains zinc-binding RING domain; mutations in human homolog cause various peroxisomal disorders   | peroxisome            | Verified | Homodiploid |                        |                              |                                 |
| <i>YDR408C</i> | <i>ADE8</i>  | 3,845                    | 0,003 | 6,694                    | 0,006 | -3,455                     | 0,002 | -4,365                 | 0,000 | Phosphoribosyl-glycinamide transformylase, catalyzes a step in the 'de novo' purine nucleotide biosynthetic pathway                                                                                                                       | nucleus, cytoplasm    | Verified | Homodiploid | ALF, HAP               |                              |                                 |
| <i>YBR110W</i> | <i>ALG1</i>  | 2,948                    | 0,014 | 6,527                    | 0,072 | -3,426                     | 0,008 | -3,247                 | 0,004 | Mannosyltransferase, involved in asparagine-linked glycosylation in the endoplasmic reticulum (ER); Essential for viability, mutation is functionally complemented by human ortholog                                                      | Endoplasmic Reticulum | Verified | Essential   |                        |                              |                                 |
| <i>YDL209C</i> | <i>CWC2</i>  | 3,484                    | 0,009 | 6,499                    | 0,055 | -4,016                     | 0,050 | -3,798                 | 0,003 | Protein involved in pre-mRNA splicing, component of a complex containing Cef1p; interacts with Prp19p; contains an RNA recognition motif; has similarity to <i>S. pombe</i> Cwf2p                                                         | nucleus               | Verified | Essential   | CS                     |                              |                                 |
| <i>YBR087W</i> | <i>RFC5</i>  | 2,892                    | 0,001 | 6,370                    | 0,084 | -3,025                     | 0,006 | -0,052                 | 0,929 | Subunit of heteropentameric Replication factor C (RF-C), which is a DNA binding protein and ATPase that acts as a clamp loader of the proliferating cell nuclear antigen (PCNA) processivity factor for DNA polymerases delta and epsilon | nucleus               | Verified | Essential   | GCR, CSA, CM, MF       |                              |                                 |

|           |         |       |       |       |       |        |       |        |       |                                                                                                                                                                                                                                                 |                    |                 |             |  |                           |  |
|-----------|---------|-------|-------|-------|-------|--------|-------|--------|-------|-------------------------------------------------------------------------------------------------------------------------------------------------------------------------------------------------------------------------------------------------|--------------------|-----------------|-------------|--|---------------------------|--|
| YFL007W   | BLM10   | 4,394 | 0,004 | 6,243 | 0,043 | -2,485 | 0,019 | -3,173 | 0,000 | Proteasome activator subunit; found in association with core particles, with and without the 19S regulatory particle; required for resistance to bleomycin, may be involved in protecting against oxidative damage; similar to mammalian PA200  | proteasome         | Verified        | Homodiploid |  | Phleomycin                |  |
| YKL053C-A | MDM35   | 3,043 | 0,003 | 6,084 | 0,043 | -0,947 | 0,350 | 2,306  | 0,066 | Mitochondrial intermembrane space cysteine motif protein; mutation affects mitochondrial distribution and morphology                                                                                                                            | mitochondrion      | Verified        | Homodiploid |  | Doxorubicin               |  |
| YML015C   | TAF11   | 3,656 | 0,011 | 6,042 | 0,089 | -1,086 | 0,253 | -3,242 | 0,004 | TFIID subunit (40 kDa), involved in RNA polymerase II transcription initiation, similar to histone H3 with atypical histone fold motif of Spt3-like transcription factors                                                                       | nucleus            | Verified        | Essential   |  |                           |  |
| YHL029C   | YHL029C | 2,688 | 0,027 | 5,954 | 0,012 | -4,626 | 0,000 | -0,751 | 0,000 | Cytoplasmic protein required for replication of Brome mosaic virus in <i>S. cerevisiae</i> , which is a model system for studying replication of positive-strand RNA viruses in their natural hosts                                             | cytoplasm          | Uncharacterized | Homodiploid |  |                           |  |
| YDR164C   | SEC1    | 2,289 | 0,011 | 5,918 | 0,067 | -3,720 | 0,001 | -2,172 | 0,010 | Sm-like protein involved in docking and fusion of exocytic vesicles through binding to assembled SNARE complexes at the membrane; localization to sites of secretion (bud neck and bud tip) is dependent on SNARE function                      | bud neck           | Verified        | Essential   |  |                           |  |
| YDR177W   | UBC1    | 3,103 | 0,097 | 5,790 | 0,050 | -4,939 | 0,002 | -3,122 | 0,046 | Ubiquitin-conjugating enzyme that mediates selective degradation of short-lived and abnormal proteins; plays a role in vesicle biogenesis and ER-associated protein degradation (ERAD); component of the cellular stress response               | proteasome         | Verified        | Essential   |  |                           |  |
| YDR060W   | MAK21   | 2,562 | 0,015 | 5,787 | 0,076 | -5,287 | 0,017 | -2,502 | 0,042 | Constituent of 66S pre-ribosomal particles, required for large (60S) ribosomal subunit biogenesis; involved in nuclear export of pre-ribosomes; required for maintenance of dsRNA virus; homolog of human CAATT-binding protein                 | nucleolus          | Verified        | Essential   |  |                           |  |
| YDL003W   | MCD1    | 3,181 | 0,004 | 5,489 | 0,003 | -3,948 | 0,000 | -4,530 | 0,001 | Essential protein required for sister chromatid cohesion in mitosis and meiosis; subunit of the cohesin complex; expression is cell cycle regulated and peaks in S phase                                                                        | nucleus            | Verified        | Essential   |  | Camptothecin              |  |
| YPR168W   | NUT2    | 4,379 | 0,002 | 5,401 | 0,008 | -5,367 | 0,000 | -3,485 | 0,000 | Subunit of the RNA polymerase II mediator complex; associates with core polymerase subunits to form the RNA polymerase II holoenzyme; required for transcriptional activation and has a role in basal transcription                             | nucleus            | Verified        | Essential   |  |                           |  |
| YPR107C   | YTH1    | 3,519 | 0,035 | 5,303 | 0,003 | -3,818 | 0,001 | -1,039 | 0,019 | Essential RNA-binding component of cleavage and polyadenylation factor, contains five zinc fingers; required for pre-mRNA 3'-end processing and polyadenylation                                                                                 | nucleus            | Verified        | Essential   |  |                           |  |
| YML079W   | YML079W | 2,859 | 0,000 | 5,142 | 0,096 | -4,203 | 0,023 | -1,898 | 0,054 | Non-Essential protein of unknown function with structural resemblance to plant storage and ligand binding proteins (canavalin, glycinin, auxin binding protein) and to some enzymes (epimerase, germin); localizes to the nucleus and cytoplasm | nucleus, cytoplasm | Uncharacterized | Homodiploid |  |                           |  |
| YMR111C   | YMR111C | 6,658 | 0,002 | 5,118 | 0,032 | -5,807 | 0,000 | -0,678 | 0,010 | Protein of unknown function; green fluorescent protein (GFP)-fusion protein localizes to the nucleus; YMR111C is not an Essential gene                                                                                                          | nucleus            | Uncharacterized | Homodiploid |  |                           |  |
| YBR059C   | AKL1    | 3,436 | 0,001 | 4,927 | 0,046 | -4,282 | 0,000 | -0,967 | 0,003 | Ser-Thr protein kinase, member (with Ark1p and Prk1p) of the Ark kinase family; involved in endocytosis and actin cytoskeleton organization                                                                                                     | unknown            | Verified        | Homodiploid |  | Doxorubicin, Tirapazamine |  |
| YML127W   | RSC9    | 3,883 | 0,038 | 4,763 | 0,040 | -6,356 | 0,008 | -5,377 | 0,000 | Component of the RSC chromatin remodeling complex; DNA-binding protein involved in the synthesis of rRNA and in transcriptional repression and activation of genes regulated by the Target of Rapamycin (TOR) pathway                           | nucleus            | Verified        | Essential   |  |                           |  |
| YHR006W   | STP2    | 3,491 | 0,000 | 4,753 | 0,093 | -0,552 | 0,015 | 0,679  | 0,006 | Transcription factor, activated by proteolytic processing in response to signals from the SPS sensor system for external amino acids; activates transcription of amino acid permease genes                                                      | nucleus            | Verified        | Homodiploid |  |                           |  |

|         |         |       |       |       |       |        |       |        |       |                                                                                                                                                                                                                                                |                                      |                 |             |                       |                                                       |         |
|---------|---------|-------|-------|-------|-------|--------|-------|--------|-------|------------------------------------------------------------------------------------------------------------------------------------------------------------------------------------------------------------------------------------------------|--------------------------------------|-----------------|-------------|-----------------------|-------------------------------------------------------|---------|
| YLR222C | UTP13   | 4,130 | 0,006 | 4,683 | 0,086 | -5,523 | 0,001 | -5,374 | 0,000 | Nucleolar protein, component of the small subunit (SSU) processome containing the U3 snoRNA that is involved in processing of pre-18S rRNA                                                                                                     | nucleolus                            | Verified        | Essential   | CS, MR                | HU                                                    | Benomyl |
| YAL055W | PEX22   | 2,763 | 0,000 | 4,635 | 0,016 | -4,246 | 0,004 | -1,696 | 0,012 | Putative peroxisomal membrane protein required for import of peroxisomal proteins, functionally complements a <i>Pichia pastoris</i> pex22 mutation                                                                                            | peroxisome                           | Verified        | Homodiploid |                       |                                                       |         |
| YOR303W | CPA1    | 9,744 | 0,010 | 4,614 | 0,040 | -3,987 | 0,000 | -2,199 | 0,000 | Small subunit of carbamoyl phosphate synthetase, which catalyzes a step in the synthesis of citrulline, an arginine precursor; translationally regulated by an attenuator peptide encoded by YOR302W within the CPA1 mRNA 5'-leader            | carbamoyl-phosphate synthase complex | Verified        | Homodiploid |                       |                                                       |         |
| YHR018C | ARG4    | 8,512 | 0,026 | 4,612 | 0,058 | -3,960 | 0,001 | -2,178 | 0,000 | Argininosuccinate lyase, catalyzes the final step in the arginine biosynthesis pathway                                                                                                                                                         | cytoplasm                            | Verified        | Homodiploid | TE-T                  |                                                       |         |
| YPL060W | LPE10   | 4,812 | 0,002 | 4,607 | 0,079 | -4,552 | 0,000 | -4,665 | 0,001 | Mitochondrial inner membrane magnesium transporter, involved in maintenance of magnesium concentrations inside mitochondria; indirectly affects splicing of group II introns; functionally and structurally related to Mrs2p                   | mitochondrion                        | Verified        | Homodiploid |                       |                                                       |         |
| YKR008W | RSC4    | 2,147 | 0,007 | 4,587 | 0,010 | -4,914 | 0,000 | -5,086 | 0,000 | Component of the RSC chromatin remodeling complex; found in close proximity to nucleosomal DNA; displaced from the surface of nucleosomal DNA after chromatin remodeling                                                                       | nucleus                              | Verified        | Essential   | TL                    |                                                       |         |
| YGR048W | UFD1    | 5,193 | 0,024 | 4,527 | 0,052 | -3,011 | 0,004 | -3,515 | 0,005 | Protein that interacts with Cdc48p and Npl4p, involved in recognition of polyubiquitinated proteins and their presentation to the 26S proteasome for degradation; involved in transporting proteins from the ER to the cytosol                 | Endoplasmic Reticulum, cytoplasm     | Verified        | Essential   |                       |                                                       |         |
| YGR021W | YGR021W | 2,107 | 0,000 | 4,480 | 0,094 | -3,797 | 0,000 | -3,000 | 0,002 | Putative protein of unknown function; the authentic, non-tagged protein is detected in highly purified mitochondria in high-throughput studies                                                                                                 | mitochondrion                        | Uncharacterized | Homodiploid |                       |                                                       |         |
| YIR006C | PAN1    | 2,785 | 0,014 | 4,430 | 0,082 | -3,698 | 0,001 | -3,793 | 0,002 | Part of actin cytoskeleton-regulatory complex Pan1p-Sla1p-End3p, associates with actin patches on the cell cortex; promotes protein-protein interactions Essential for endocytosis; previously thought to be a subunit of poly(A) ribonuclease | actin patches                        | Verified        | Essential   |                       |                                                       |         |
| YER025W | GCD11   | 2,572 | 0,001 | 4,414 | 0,005 | -3,662 | 0,000 | -3,494 | 0,000 | Gamma subunit of the translation initiation factor eIF2, involved in the identification of the start codon; binds GTP when forming the ternary complex with GTP and tRNAi-Met                                                                  | cytoplasm, ribosome                  | Verified        | Essential   |                       |                                                       |         |
| YGL233W | SEC15   | 3,247 | 0,029 | 4,380 | 0,054 | -5,167 | 0,000 | -3,751 | 0,000 | Essential 113kDa subunit of the exocyst complex (Sec3p, Sec5p, Sec6p, Sec8p, Sec10p, Sec15p, Exo70p, and Exo84p), which mediates polarized targeting of vesicles to active sites of exocytosis; Sec15p associates with Sec4p and vesicles      | vesicles                             | Verified        | Essential   |                       |                                                       |         |
| YGR095C | RRP46   | 2,457 | 0,006 | 4,379 | 0,093 | -3,419 | 0,000 | -2,800 | 0,013 | Protein involved in rRNA processing; component of the exosome 3->5 exonuclease complex                                                                                                                                                         | nuclear and cytoplasmic egosom       | Verified        | Essential   |                       |                                                       |         |
| YJR141W | YJR141W | 2,890 | 0,041 | 4,351 | 0,039 | -5,082 | 0,003 | -3,115 | 0,004 | Essential protein of unknown function                                                                                                                                                                                                          | unknown                              | Uncharacterized | Essential   |                       |                                                       |         |
| YGL086W | MAD1    | 2,410 | 0,028 | 4,270 | 0,054 | -3,533 | 0,002 | 0,390  | 0,270 | Coiled-coil protein involved in the spindle-assembly checkpoint; phosphorylated by Mps1p upon checkpoint activation which leads to inhibition of the activity of the anaphase promoting complex; forms a complex with Mad2p                    | nucleus                              | Verified        | Homodiploid | BIM, CTF, CM, CS      |                                                       | Benomyl |
| YIL089W | YIL089W | 2,026 | 0,000 | 4,191 | 0,095 | -1,693 | 0,001 | -4,266 | 0,000 | Putative protein of unknown function                                                                                                                                                                                                           | unknown                              | Uncharacterized | Homodiploid |                       |                                                       |         |
| YDR217C | RAD9    | 5,075 | 0,034 | 4,185 | 0,082 | -5,063 | 0,000 | -5,156 | 0,000 | DNA damage-dependent checkpoint protein, required for cell-cycle arrest in G1/S, intra-S, and G2/M; transmits checkpoint signal by activating Rad53p and Chk1p; hyperphosphorylated by Mec1p and Tel1p; potential Cdc28p substrate             | nucleus                              | Verified        | Homodiploid | BIM, ALF, GCR, CM, MF | HU, MMS, Phleomycin, Camptothecin, OXY, Metal, γR, UV |         |



|           |           |       |       |       |       |        |       |        |       |                                                                                                                                                                                                                                                  |                                        |                 |             |      |                    |     |
|-----------|-----------|-------|-------|-------|-------|--------|-------|--------|-------|--------------------------------------------------------------------------------------------------------------------------------------------------------------------------------------------------------------------------------------------------|----------------------------------------|-----------------|-------------|------|--------------------|-----|
| YER038C   | KRE29     | 4,118 | 0,023 | 4,147 | 0,028 | -5,205 | 0,000 | -4,913 | 0,000 | Essential subunit of the Mms21-Smc5-Smc6 complex; protein of unknown function; required for growth and DNA repair; heterozygous mutant shows haploinsufficiency in K1 killer toxin resistance                                                    | nucleus                                | Verified        | Essential   |      |                    |     |
| YBR155W   | CNS1      | 2,940 | 0,022 | 4,127 | 0,029 | -4,750 | 0,000 | -4,887 | 0,000 | TPR-containing co-chaperone; binds both Hsp82p (Hsp90) and Ssa1p (Hsp70) and stimulates the ATPase activity of SSA1, ts mutants reduce Hsp82p function while over expression suppresses the phenotypes of an HSP82 ts allele and a cpr7 deletion | cytoplasm                              | Verified        | Essential   |      |                    |     |
| YAR031W   | PRM9      | 2,480 | 0,001 | 4,116 | 0,019 | -4,372 | 0,002 | -4,321 | 0,004 | Pheromone-regulated protein with 3 predicted transmembrane segments and an FF sequence, a motif involved in COPII binding; member of DUP240 gene family                                                                                          | Endoplasmic Reticulum, plasma membrane | Verified        | Homodiploid |      | UV                 |     |
| YPL181W   | CTI6      | 2,661 | 0,044 | 4,050 | 0,054 | -4,238 | 0,002 | -4,006 | 0,000 | Protein that relieves transcriptional repression by binding to the Cyc8p-Tup1p corepressor and recruiting the SAGA complex to the repressed promoter; contains a PHomodiploid finger domain                                                      | nucleus                                | V               | Homodiploid |      | Metal, Doxorubicin |     |
| YOR038C   | HIR2      | 2,465 | 0,001 | 4,020 | 0,010 | -3,125 | 0,001 | 0,390  | 0,056 | Subunit of the HIR complex, a nucleosome assembly complex involved in regulation of histone gene transcription; recruits Swi-Snf complexes to histone gene promoters; promotes heterochromatic gene silencing with Asf1p                         | nucleus                                | Verified        | Homodiploid | TE-T |                    |     |
| YJL024C   | APS3      | 3,637 | 0,060 | 4,012 | 0,007 | -3,108 | 0,002 | -0,508 | 0,405 | Small subunit of the clathrin-associated adaptor complex AP-3, which is involved in vacuolar protein sorting; related to the sigma subunit of the mammalian clathrin AP-3 complex; suppressor of loss of casein kinase 1 function                | vacuole                                | Verified        | Homodiploid |      | Metal              |     |
| YPL137C   | GIP3      | 3,467 | 0,013 | 3,998 | 0,065 | -3,268 | 0,000 | -4,624 | 0,000 | Glc7-interacting protein whose overexpression relocalizes Glc7p from the nucleus and prevents chromosome segregation; may interact with ribosomes, based on co-purification experiments                                                          | nucleus                                | Verified        | Homodiploid |      |                    | CCP |
| YDR313C   | PIB1      | 2,820 | 0,001 | 3,965 | 0,072 | -4,751 | 0,000 | -3,527 | 0,000 | RING-type ubiquitin ligase of the endosomal and vacuolar membranes, binds phosphatidylinositol(3)-phosphate; contains a FYVE finger domain                                                                                                       | vacuole                                | Verified        | Homodiploid |      |                    |     |
| YBR103W   | SIF2      | 6,165 | 0,090 | 3,943 | 0,016 | -3,644 | 0,000 | -3,774 | 0,000 | WD40 repeat-containing subunit of the Set3C histone deacetylase complex, which represses early/middle sporulation genes; antagonizes telomeric silencing; binds specifically to the Sir4p N-terminus                                             | nucleus                                | Verified        | Homodiploid |      |                    |     |
| YGR127W   | YGR127W   | 2,548 | 0,001 | 3,933 | 0,015 | -4,416 | 0,000 | -2,006 | 0,000 | Putative protein of unknown function; expression is regulated by Msn2p/Msn4p, indicating a possible role in stress response                                                                                                                      | unknown                                | Uncharacterized | Homodiploid |      |                    |     |
| YMR194C-A | YMR194C-A | 2,869 | 0,068 | 3,927 | 0,023 | -4,751 | 0,000 | -5,110 | 0,000 | Dubious open reading frame unlikely to encode a functional protein, based on available experimental and comparative sequence data                                                                                                                | unknown                                | Dubious         | Homodiploid |      |                    |     |
| YER112W   | LSM4      | 2,210 | 0,017 | 3,916 | 0,094 | -3,589 | 0,002 | -3,099 | 0,001 | Lsm (Like Sm) protein; part of heteroheptameric complexes (Lsm2p-7p and either Lsm1p or 8p): cytoplasmic Lsm1p complex involved in mRNA decay; nuclear Lsm8p complex part of U6 snRNP and possibly involved in processing tRNA, snoRNA, and rRNA | nucleus, cytoplasm, nucleolus          | Verified        | Essential   |      |                    |     |
| YLR347C   | KAP95     | 2,684 | 0,000 | 3,905 | 0,088 | -3,631 | 0,001 | 0,750  | 0,037 | Karyopherin beta, forms a dimeric complex with Srp1p (Kap60p) that mediates nuclear import of cargo proteins via a nuclear localization signal (NLS), interacts with nucleoporins to guide transport across the nuclear pore complex             | nucleus                                | Verified        | Essential   |      |                    | NT  |
| YMR290C   | HAS1      | 5,005 | 0,003 | 3,870 | 0,038 | -5,450 | 0,003 | -4,408 | 0,003 | ATP-dependent RNA helicase; localizes to both the nuclear periphery and nucleolus; highly enriched in nuclear pore complex fractions; constituent of 66S pre-ribosomal particles                                                                 | nucleolus                              | Verified        | Essential   |      |                    |     |
| YOR372C   | NDD1      | 3,899 | 0,001 | 3,858 | 0,021 | -5,057 | 0,000 | -3,965 | 0,000 | Transcriptional activator Essential for nuclear division; localized to the nucleus; Essential component of the mechanism that activates the expression of a set of late-S-phase-specific genes                                                   | nucleus                                | Verified        | Essential   |      |                    |     |

|           |         |       |       |       |       |        |       |        |       |                                                                                                                                                                                                                                                  |                                      |          |             |                                |                    |       |
|-----------|---------|-------|-------|-------|-------|--------|-------|--------|-------|--------------------------------------------------------------------------------------------------------------------------------------------------------------------------------------------------------------------------------------------------|--------------------------------------|----------|-------------|--------------------------------|--------------------|-------|
| YKL111C   | YKL111C | 4,471 | 0,008 | 3,857 | 0,091 | -4,885 | 0,000 | -3,588 | 0,000 | Dubious open reading frame, unlikely to encode a protein; not conserved in closely related <i>Saccharomyces</i> species; partially overlaps the verified Essential gene ABF1                                                                     | unknown                              | Dubious  | Essential   |                                |                    |       |
| YGL226C-A | OST5    | 2,464 | 0,012 | 3,842 | 0,055 | -0,577 | 0,113 | 0,186  | 0,758 | Zeta subunit of the oligosaccharyltransferase complex of the ER lumen, which catalyzes asparagine-linked glycosylation of newly synthesized proteins                                                                                             | Endoplasmic Reticulum                | Verified | Homodiploid |                                |                    |       |
| YGR246C   | BRF1    | 3,097 | 0,003 | 3,827 | 0,005 | -4,523 | 0,001 | -4,890 | 0,002 | TFIIB B-related factor, one of three subunits of RNA polymerase III transcription initiation factor TFIIB, binds TFIIC and TBP and recruits RNA pol III to promoters, amino-terminal half is homologous to TFIIB                                 | nucleus                              | Verified | Essential   |                                |                    |       |
| YBR072W   | HSP26   | 3,176 | 0,007 | 3,821 | 0,078 | -4,319 | 0,000 | -0,965 | 0,001 | Small heat shock protein (sHSP) with chaperone activity; forms hollow, sphere-shaped oligomers that suppress unfolded proteins aggregation; oligomer activation requires a heat-induced conformational change; not expressed in unstressed cells | nucleus, cytoplasm                   | Verified | Homodiploid |                                |                    |       |
| YNL131W   | TOM22   | 5,754 | 0,069 | 3,769 | 0,094 | -2,218 | 0,008 | -2,879 | 0,010 | Component of the TOM (translocase of outer membrane) complex responsible for initial import of mitochondrially directed proteins; acts as a receptor for precursor proteins and mediates interaction between the TOM and TIM complexes           | mitochondrion                        | Verified | Essential   |                                |                    | CCP   |
| YDR485C   | VPS72   | 2,133 | 0,030 | 3,686 | 0,088 | -4,328 | 0,001 | -0,835 | 0,069 | Htz1p-binding component of the SWR1 complex, which exchanges histone variant H2AZ (Htz1p) for chromatin-bound histone H2A; required for vacuolar protein sorting                                                                                 | nucleus                              | Verified | Homodiploid | MR                             |                    | ionic |
| YPL028W   | ERG10   | 5,165 | 0,005 | 3,680 | 0,071 | -1,497 | 0,137 | -4,151 | 0,005 | Acetyl-CoA C-acetyltransferase (acetoacetyl-CoA thiolase), cytosolic enzyme that transfers an acetyl group from one acetyl-CoA molecule to another, forming acetoacetyl-CoA; involved in the first step in mevalonate biosynthesis               | cytoplasm                            | Verified | Essential   |                                |                    |       |
| YJL009W   | YJL009W | 4,454 | 0,099 | 3,650 | 0,031 | -4,982 | 0,000 | -4,118 | 0,004 | Dubious open reading frame unlikely to encode a protein, based on available experimental and comparative sequence data; partially overlaps CCT8/YJL008C, a verified gene encoding a subunit of the cytosolic chaperonin Cct ring complex         | unknown                              | Dubious  | Essential   |                                |                    |       |
| YJL019W   | MPS3    | 2,900 | 0,005 | 3,597 | 0,021 | -3,899 | 0,001 | -4,501 | 0,005 | Nuclear envelope protein required for SPB duplication and nuclear fusion; localizes to the SPB half bridge and at telomeres during meiosis; required with Ndj1p and Csm4p for meiotic bouquet formation and telomere-led rapid prophase movement | nucleus, Spindle Pole Body, telomere | Verified | Essential   |                                |                    |       |
| YIR011C   | STS1    | 2,727 | 0,008 | 3,589 | 0,063 | -6,233 | 0,000 | -4,033 | 0,000 | Protein that interacts with the karyopherin Srp1p; may have a role with Srp1p in ubiquitin-mediated protein degradation                                                                                                                          | nucleus                              | Verified | Essential   | CS                             |                    |       |
| YPL022W   | RAD1    | 4,882 | 0,014 | 3,566 | 0,001 | -5,507 | 0,011 | -0,893 | 0,007 | Single-stranded DNA endonuclease (with Rad10p), cleaves single-stranded DNA during nucleotide excision repair and double-strand break repair; subunit of Nucleotide Excision Repair Factor 1 (NEF1); homolog of human XPF protein                | nucleus                              | Verified | Homodiploid | ALF, Can <sup>R</sup> , MR, MF | MMS, UV, Cisplatin |       |
| YIL101C   | XBP1    | 2,631 | 0,047 | 3,552 | 0,047 | -4,474 | 0,000 | -0,163 | 0,252 | Transcriptional repressor that binds to promoter sequences of the cyclin genes, CYS3, and SMF2; expression is induced by stress or starvation during mitosis, and late in meiosis; member of the Swi4p/Mbp1p family; potential Cdc28p substrate  | nucleus                              | Verified | Homodiploid |                                |                    |       |
| YAL028W   | FRT2    | 3,522 | 0,007 | 3,548 | 0,009 | -3,994 | 0,003 | -3,382 | 0,008 | Tail-anchored endoplasmic reticulum membrane protein, interacts with homolog Frt1p but is not a substrate of calcineurin (unlike Frt1p), promotes growth in conditions of high Na+, alkaline pH, or cell wall stress; potential Cdc28p substrate | Endoplasmic Reticulum                | Verified | Homodiploid |                                | UV                 |       |
| YJR109C   | CPA2    | 6,665 | 0,012 | 3,530 | 0,060 | -5,424 | 0,000 | -4,025 | 0,000 | Large subunit of carbamoyl phosphate synthetase, which catalyzes a step in the synthesis of citrulline, an arginine precursor                                                                                                                    | carbamoyl-phosphate synthase complex | Verified | Homodiploid |                                |                    |       |

|         |         |       |       |       |       |        |       |        |       |                                                                                                                                                                                                                                      |                           |          |             |                            |                     |         |
|---------|---------|-------|-------|-------|-------|--------|-------|--------|-------|--------------------------------------------------------------------------------------------------------------------------------------------------------------------------------------------------------------------------------------|---------------------------|----------|-------------|----------------------------|---------------------|---------|
| YPR018W | RLF2    | 2,678 | 0,013 | 3,524 | 0,021 | -3,109 | 0,001 | -1,253 | 0,002 | Largest subunit (p90) of the Chromatin Assembly Complex (CAF-1) with Cac2p and Msi1p that assembles newly synthesized histones onto recently replicated DNA; involved in the maintenance of transcriptionally silent chromatin       | nucleus                   | Verified | Homodiploid | LOH, CM                    | Camptothecin, UV    | SA      |
| YPL055C | LGE1    | 3,297 | 0,071 | 3,520 | 0,014 | 2,894  | 0,620 | -0,010 | 1,000 | Protein of unknown function; null mutant forms abnormally large cells, and homozygous diploid null mutant displays delayed premeiotic DNA synthesis and reduced efficiency of meiotic nuclear division                               | nucleus                   | Verified | Homodiploid | BIM, CTF, ALF, CM, CS, CSA | HU, UV, Doxorubicin | SA      |
| YBR070C | ALG14   | 2,032 | 0,031 | 3,512 | 0,046 | -1,530 | 0,102 | -1,124 | 0,173 | Component of UDP-GlcNAc transferase required for the second step of dolichyl-linked oligosaccharide synthesis; anchors the catalytic subunit Alg13p to the ER membrane; similar to bacterial and human glycosyltransferases          | unknown                   | Verified | Essential   |                            |                     |         |
| YDR221W | GTB1    | 2,935 | 0,002 | 3,456 | 0,025 | 0,226  | 0,009 | -2,337 | 0,000 | Glucosidase II beta subunit, forms a complex with alpha subunit Rot2p, involved in removal of two glucose residues from N-linked glycans during glycoprotein biogenesis in the ER                                                    | Endoplasmic Reticulum     | Verified | Homodiploid |                            |                     |         |
| YLR044C | PDC1    | 3,496 | 0,004 | 3,452 | 0,065 | -4,288 | 0,000 | -2,904 | 0,000 | Major of three pyruvate decarboxylase isozymes, key enzyme in alcoholic fermentation, decarboxylates pyruvate to acetaldehyde; subject to glucose-, ethanol-, and autoregulation; involved in amino acid catabolism                  | nucleus, cytoplasm        | Verified | Homodiploid |                            | OXY                 |         |
| YPL238C | YPL238C | 3,089 | 0,036 | 3,440 | 0,021 | -5,048 | 0,020 | -5,450 | 0,001 | Dubious open reading frame unlikely to encode a functional protein, based on available experimental and comparative sequence data; partially overlaps 5' end of the verified Essential gene SUI3/YPL237W                             | unknown                   | Dubious  | Essential   |                            |                     |         |
| YBR174C | YBR174C | 2,663 | 0,072 | 3,435 | 0,082 | -3,717 | 0,001 | -2,623 | 0,000 | Dubious open reading frame unlikely to encode a protein, based on available experimental and comparative sequence data; partially overlaps the verified ORF YBR175W; null mutant is viable and sporulation defective                 | unknown                   | Dubious  | Homodiploid |                            | HU, UV              |         |
| YGR156W | PTI1    | 3,660 | 0,020 | 3,415 | 0,049 | -3,571 | 0,002 | -3,784 | 0,001 | Pta1p Interacting protein                                                                                                                                                                                                            | nucleus                   | Verified | Essential   |                            |                     |         |
| YDR293C | SSD1    | 4,841 | 0,000 | 3,406 | 0,004 | -4,083 | 0,000 | -4,440 | 0,000 | Protein with a role in maintenance of cellular integrity, interacts with components of the TOR pathway; ssd1 mutant of a clinical S. cerevisiae strain displays elevated virulence                                                   | cytoplasm                 | Verified | Homodiploid | CM                         |                     |         |
| YJL010C | YJL010C | 2,904 | 0,025 | 3,389 | 0,011 | -2,430 | 0,002 | -5,469 | 0,005 | Essential component of pre-40S ribosomes that is required for early cleavages of 35S pre-rRNA and hence formation of 18S rRNA; binds RNA in vitro and contains multiple pumilio-like repeats                                         | nucleolus                 | Verified | Essential   |                            |                     |         |
| YNL272C | SEC2    | 4,926 | 0,025 | 3,361 | 0,021 | -4,449 | 0,003 | -4,329 | 0,001 | Guanyl-nucleotide exchange factor for the small G-protein Sec4p, located on cytoplasmic vesicles; Essential for post-Golgi vesicle transport                                                                                         | Golgi apparatus, vesicles | Verified | Essential   |                            |                     |         |
| YBL097W | BRN1    | 3,900 | 0,090 | 3,339 | 0,035 | -3,566 | 0,013 | -1,252 | 0,008 | Essential protein required for chromosome condensation, likely to function as an intrinsic component of the condensation machinery, may influence multiple aspects of chromosome transmission and dynamics                           | nucleus                   | Verified | Essential   | CSA                        |                     | SA, CCP |
| YNL222W | SSU72   | 4,216 | 0,001 | 3,289 | 0,061 | -3,565 | 0,002 | -3,342 | 0,001 | Transcription/RNA-processing factor that associates with TFIIB and cleavage/polyadenylation factor Pta1p; exhibits phosphatase activity on serine-5 of the RNA polymerase II C-terminal domain; affects start site selection in vivo | nucleolus                 | Verified | Essential   |                            |                     |         |
| YPL029W | SUV3    | 2,431 | 0,046 | 3,269 | 0,009 | -2,937 | 0,000 | -1,667 | 0,005 | ATP-dependent RNA helicase, component of the mitochondrial degradosome along with the RNase Dss1p; the degradosome associates with the ribosome and mediates turnover of aberrant or unprocessed RNAs                                | mitochondrion             | Verified | Homodiploid | rho-MF                     | Doxorubicin         |         |
| YBR252W | DUT1    | 2,589 | 0,007 | 3,234 | 0,013 | -4,931 | 0,002 | -2,375 | 0,033 | dUTPase, catalyzes hydrolysis of dUTP to dUMP and PPi, thereby preventing incorporation of uracil into DNA during replication; critical for the maintenance of genetic stability                                                     | nucleus                   | Verified | Essential   | MF                         |                     |         |

|         |         |       |       |       |       |        |       |        |       |                                                                                                                                                                                                                                                 |                            |                 |             |     |              |         |
|---------|---------|-------|-------|-------|-------|--------|-------|--------|-------|-------------------------------------------------------------------------------------------------------------------------------------------------------------------------------------------------------------------------------------------------|----------------------------|-----------------|-------------|-----|--------------|---------|
| YAR035W | YAT1    | 2,551 | 0,007 | 3,138 | 0,015 | 0,549  | 0,167 | -1,036 | 0,036 | Outer mitochondrial carnitine acetyltransferase, minor ethanol-inducible enzyme involved in transport of activated acyl groups from the cytoplasm into the mitochondrial matrix; phosphorylated                                                 | mitochondrion              | Verified        | Homodiploid |     | UV           |         |
| YOR122C | PFY1    | 2,064 | 0,010 | 3,119 | 0,070 | -4,512 | 0,000 | -2,207 | 0,000 | Profilin, actin- and phosphatidylinositol 4,5-bisphosphate-binding protein, involved in cytoskeleton organization, required for normal timing of actin polymerization in response to thermal stress; localizes to plasma membrane and cytosol   | cytoplasm, plasma membrane | Verified        | Essential   |     |              |         |
| YER018C | SPC25   | 5,749 | 0,082 | 3,116 | 0,055 | -2,878 | 0,002 | -1,804 | 0,302 | Component of the evolutionarily conserved kinetochore-associated Ndc80 complex (Ndc80p-Nuf2p-Spc24p-Spc25p); involved in chromosome segregation, spindle checkpoint activity and kinetochore clustering                                         | nucleus                    | Verified        | Essential   |     |              |         |
| YOR143C | THI80   | 2,538 | 0,087 | 3,111 | 0,057 | -4,597 | 0,000 | -4,381 | 0,001 | Thiamine pyrophosphokinase, phosphorylates thiamine to produce the coenzyme thiamine pyrophosphate (thiamine diphosphate)                                                                                                                       | cytoplasm                  | Verified        | Essential   |     |              |         |
| YAL036C | RBG1    | 2,079 | 0,000 | 3,049 | 0,002 | -4,151 | 0,006 | -4,614 | 0,002 | Member of the DRG family of GTP-binding proteins; interacts with translating ribosomes and with Tma46p                                                                                                                                          | cytoplasm                  | Verified        | Homodiploid |     |              |         |
| YAL065C | YAL065C | 2,221 | 0,002 | 3,041 | 0,002 | -4,295 | 0,000 | -1,888 | 0,009 | Putative protein of unknown function; has homology to FLO1; possible pseudogene                                                                                                                                                                 | unknown                    | Uncharacterized | Homodiploid |     | Tirapazamine |         |
| YKL008C | LAC1    | 2,700 | 0,001 | 3,029 | 0,025 | -4,456 | 0,000 | -1,431 | 0,000 | Ceramide synthase component, involved in synthesis of ceramide from C26(acyl)-coenzyme A and dihydrosphingosine or phytosphingosine, functionally equivalent to Lag1p                                                                           | Endoplasmic Reticulum      | Verified        | Homodiploid |     |              |         |
| YMR185W | YMR185W | 4,990 | 0,000 | 3,002 | 0,035 | -4,694 | 0,001 | -5,973 | 0,001 | Putative protein of unknown function; Essential gene required for viability                                                                                                                                                                     | unknown                    | Uncharacterized | Essential   |     |              |         |
| YBR032W | YBR032W | 3,000 | 0,002 | 2,991 | 0,048 | -5,040 | 0,000 | -5,651 | 0,000 | Dubious open reading frame unlikely to encode a protein, based on experimental and comparative sequence data                                                                                                                                    | unknown                    | Dubious         | Homodiploid |     |              | Benomyl |
| YLL031C | GPI13   | 4,086 | 0,079 | 2,973 | 0,039 | -3,228 | 0,000 | -2,460 | 0,003 | ER membrane localized phosphoryltransferase that adds phosphoethanolamine onto the third mannose residue of the glycosylphosphatidylinositol (GPI) anchor precursor; similar to human PIG-O protein                                             | Endoplasmic Reticulum      | Verified        | Essential   |     |              |         |
| YGR204W | ADE3    | 2,247 | 0,007 | 2,956 | 0,039 | -2,245 | 0,000 | -2,694 | 0,001 | Cytoplasmic trifunctional enzyme C1-tetrahydrofolate synthase, involved in single carbon metabolism and required for biosynthesis of purines, thymidylate, methionine, and histidine                                                            | cytoplasm                  | Verified        | Homodiploid | HAP | Doxorubicin  |         |
| YOR098C | NUP1    | 3,462 | 0,001 | 2,942 | 0,007 | -4,155 | 0,004 | -3,512 | 0,023 | Nuclear pore complex (NPC) subunit, involved in protein import/export and in export of RNAs, possible karyopherin release factor that accelerates release of karyopherin-cargo complexes after transport across NPC; potential Cdc28p substrate | nucleus                    | Verified        | Essential   |     |              | NT      |
| YDR139C | RUB1    | 2,067 | 0,002 | 2,895 | 0,090 | -5,428 | 0,000 | -4,259 | 0,000 | Ubiquitin-like protein with similarity to mammalian NEDD8; conjugation (neddylation) substrates include the cullins Cdc53p, Rtt101p, and Cul3p; activated by Ula1p and Uba3p (E1 enzyme pair); conjugation mediated by Ubc12p (E2 enzyme)       | cytoplasm                  | Verified        | Homodiploid |     |              |         |
| YDR370C | YDR370C | 3,180 | 0,001 | 2,870 | 0,044 | -6,054 | 0,000 | -0,091 | 0,580 | Putative protein of unknown function                                                                                                                                                                                                            | unknown                    | Uncharacterized | Homodiploid |     |              |         |
| YNL182C | IPI3    | 2,087 | 0,036 | 2,839 | 0,037 | -4,871 | 0,000 | -4,304 | 0,000 | Essential component of the Rix1 complex (Rix1p, Ipi1p, Ipi3p) that is required for processing of ITS2 sequences from 35S pre-rRNA; highly conserved and contains WD40 motifs; Rix1 complex associates with Mdn1p in pre-60S ribosomal particles | nucleolus                  | Verified        | Essential   |     |              |         |
| YDL143W | CCT4    | 3,466 | 0,042 | 2,819 | 0,049 | -5,264 | 0,000 | -2,886 | 0,000 | Subunit of the cytosolic chaperonin Cct ring complex, related to Tcp1p, required for the assembly of actin and tubulins in vivo                                                                                                                 | T-complex                  | Verified        | Essential   |     |              |         |
| YIL083C | YIL083C | 2,374 | 0,086 | 2,811 | 0,029 | -3,206 | 0,002 | -3,964 | 0,003 | Putative phosphopantothenoylecysteine synthetase (PPCS) that catalyzes the second step in the biosynthesis of coenzyme A from pantothenate; conserved in bacteria, humans, and plants; Essential for viability                                  | nucleus, cytoplasm         | Uncharacterized | Essential   |     |              |         |



|         |         |       |       |       |       |        |       |        |       |                                                                                                                                                                                                                                                  |                       |                 |             |             |             |         |
|---------|---------|-------|-------|-------|-------|--------|-------|--------|-------|--------------------------------------------------------------------------------------------------------------------------------------------------------------------------------------------------------------------------------------------------|-----------------------|-----------------|-------------|-------------|-------------|---------|
| YIR002C | MPH1    | 5,464 | 0,050 | 2,800 | 0,001 | -4,243 | 0,000 | -1,523 | 0,000 | Member of the DEAH family of helicases, functions in an error-free DNA damage bypass pathway that involves homologous recombination, mutations confer a mutator phenotype                                                                        | nucleus               | Verified        | Homodiploid | BIM         | MMS         |         |
| YBR116C | YBR116C | 2,215 | 0,000 | 2,792 | 0,077 | -3,977 | 0,000 | -2,885 | 0,000 | Dubious open reading frame unlikely to encode a protein, based on available experimental and comparative sequence data; partially overlaps the verified gene TKL2                                                                                | unknown               | Dubious         | Homodiploid |             |             |         |
| YPL078C | ATP4    | 2,194 | 0,014 | 2,722 | 0,015 | -3,381 | 0,000 | -1,373 | 0,000 | Subunit b of the stator stalk of mitochondrial F1F0 ATP synthase, which is a large, evolutionarily conserved enzyme complex required for ATP synthesis; phosphorylated                                                                           | mitochondrion         | Verified        | Homodiploid |             |             | CCP     |
| YKL034W | TUL1    | 3,469 | 0,021 | 2,696 | 0,027 | 0,996  | 0,000 | -0,488 | 0,110 | Golgi-localized RING-finger ubiquitin ligase (E3), involved in ubiquitinating and sorting membrane proteins that contain polar transmembrane domains to multivesicular bodies for delivery to the vacuole for quality control purposes           | Golgi apparatus       | Verified        | Homodiploid |             |             |         |
| YGR171C | MSM1    | 2,121 | 0,077 | 2,667 | 0,040 | 0,478  | 0,008 | -2,221 | 0,000 | Mitochondrial methionyl-tRNA synthetase (MetRS), functions as a monomer in mitochondrial protein synthesis; functions similarly to cytoplasmic MetRS although the cytoplasmic form contains a zinc-binding domain not found in Msm1p             | mitochondrion         | Verified        | Homodiploid | ALF         | Doxorubicin |         |
| YGL007W | BRP1    | 2,580 | 0,089 | 2,655 | 0,024 | -2,092 | 0,060 | -1,831 | 0,207 | Dubious ORF located in the upstream region of PMA1, deletion leads to polyamine resistance due to downregulation of PMA1                                                                                                                         | unknown               | Dubious         | Homodiploid |             |             |         |
| YJL148W | RPA34   | 4,447 | 0,007 | 2,628 | 0,061 | -3,278 | 0,000 | -2,581 | 0,000 | RNA polymerase I subunit A34.5                                                                                                                                                                                                                   | nucleolus             | Verified        | Homodiploid | LOH, CM, CS | Doxorubicin |         |
| YDL076C | RXT3    | 2,245 | 0,071 | 2,618 | 0,043 | -5,193 | 0,000 | 0,697  | 0,028 | Subunit of the RPD3L complex; involved in histone deacetylation                                                                                                                                                                                  | nucleus               | Verified        | Homodiploid |             |             |         |
| YBR126C | TPS1    | 5,447 | 0,086 | 2,618 | 0,033 | 2,434  | 0,158 | -0,353 | 0,644 | Synthase subunit of trehalose-6-phosphate synthase/phosphatase complex, which synthesizes the storage carbohydrate trehalose; also found in a monomeric form; expression is induced by the stress response and repressed by the Ras-cAMP pathway | cytoplasm             | Verified        | Homodiploid |             | Doxorubicin |         |
| YBR124W | YBR124W | 4,217 | 0,024 | 2,612 | 0,067 | -2,434 | 0,000 | -3,893 | 0,000 | Putative protein of unknown function                                                                                                                                                                                                             | unknown               | Dubious         | Essential   |             |             |         |
| YLR371W | ROM2    | 3,305 | 0,015 | 2,605 | 0,050 | -1,985 | 0,103 | -3,281 | 0,004 | GDP/GTP exchange protein (GEP) for Rho1p and Rho2p; mutations are synthetically lethal with mutations in rom1, which also encodes a GEP                                                                                                          | bud tip               | Verified        | Homodiploid |             |             | Benomyl |
| YGL260W | YGL260W | 2,255 | 0,000 | 2,593 | 0,020 | -5,306 | 0,000 | 0,449  | 0,034 | Putative protein of unknown function; transcription is significantly increased in a NAP1 deletion background; deletion mutant has increased accumulation of nickel and selenium                                                                  | unknown               | Uncharacterized | Homodiploid |             |             |         |
| YBR233W | PBP2    | 3,102 | 0,023 | 2,535 | 0,078 | -4,472 | 0,000 | -4,222 | 0,000 | RNA binding protein with similarity to mammalian heterogeneous nuclear RNP K protein, involved in the regulation of telomere position effect and telomere length                                                                                 | nucleus               | Verified        | Homodiploid |             |             |         |
| YDL062W | YDL062W | 2,293 | 0,001 | 2,503 | 0,008 | -4,236 | 0,000 | -2,774 | 0,003 | Dubious open reading frame unlikely to encode a protein, based on available experimental and comparative sequence data; partially overlaps uncharacterized ORF YDL063C; YDL062W is not Essential                                                 | unknown               | Dubious         | Homodiploid |             |             |         |
| YMR298W | LIP1    | 2,657 | 0,007 | 2,496 | 0,013 | -5,286 | 0,000 | -5,216 | 0,000 | Ceramide synthase subunit; single-span ER membrane protein associated with Lag1p and Lac1p and required for ceramide synthase activity, null mutant grows extremely slowly and is defective in ceramide synthesis                                | Endoplasmic Reticulum | Verified        | Essential   |             |             |         |
| YLR336C | SGD1    | 2,190 | 0,045 | 2,495 | 0,021 | -1,948 | 0,027 | -0,999 | 0,581 | Essential nuclear protein with a possible role in the osmoregulatory glycerol response; interacts with phospholipase C (Plc1p); putative homolog of human NOM1 which is implicated in acute myeloid leukemia                                     | nucleus               | Verified        | Essential   |             |             | NT      |
| YNL143C | YNL143C | 2,716 | 0,001 | 2,492 | 0,042 | -5,116 | 0,000 | -2,657 | 0,000 | Dubious open reading frame unlikely to encode a protein, based on available experimental and comparative sequence data                                                                                                                           | unknown               | Dubious         | Homodiploid |             |             |         |
| YIL055C | YIL055C | 2,600 | 0,020 | 2,472 | 0,030 | -4,365 | 0,000 | -5,397 | 0,000 | Putative protein of unknown function                                                                                                                                                                                                             | unknown               | Uncharacterized | Homodiploid | RMCD        |             |         |

|         |         |       |       |       |       |        |       |        |       |                                                                                                                                                                                                                                                 |                                  |                 |             |                    |                  |         |
|---------|---------|-------|-------|-------|-------|--------|-------|--------|-------|-------------------------------------------------------------------------------------------------------------------------------------------------------------------------------------------------------------------------------------------------|----------------------------------|-----------------|-------------|--------------------|------------------|---------|
| YLR397C | AFG2    | 2,659 | 0,027 | 2,467 | 0,018 | -1,486 | 0,207 | -1,560 | 0,020 | ATPase of the CDC48/PAS1/SEC18 (AAA) family, forms a hexameric complex; may be involved in degradation of aberrant mRNAs                                                                                                                        | intracellular                    | Verified        | Essential   |                    |                  | NT      |
| YDR211W | GCD6    | 2,333 | 0,018 | 2,463 | 0,056 | -4,128 | 0,023 | -4,001 | 0,017 | Catalytic epsilon subunit of the translation initiation factor eIF2B, the guanine-nucleotide exchange factor for eIF2; activity subsequently regulated by phosphorylated eIF2; first identified as a negative regulator of GCN4 expression      | nucleus                          | Verified        | Essential   |                    |                  |         |
| YBL018C | POP8    | 4,801 | 0,000 | 2,418 | 0,019 | -4,101 | 0,000 | -3,384 | 0,000 | Subunit of both RNase MRP, which cleaves pre-rRNA, and nuclear RNase P, which cleaves tRNA precursors to generate mature 5' ends                                                                                                                | nucleolus                        | Verified        | Essential   |                    |                  |         |
| YKL022C | CDC16   | 2,846 | 0,011 | 2,396 | 0,006 | -3,500 | 0,004 | -3,399 | 0,001 | Subunit of the anaphase-promoting complex/cyclosome (APC/C), which is a ubiquitin-protein ligase required for degradation of anaphase inhibitors, including mitotic cyclins, during the metaphase/anaphase transition; required for sporulation | nucleus                          | Verified        | Essential   | TL                 |                  | CCP     |
| YBR133C | HSL7    | 2,041 | 0,096 | 2,396 | 0,076 | -2,954 | 0,016 | -0,637 | 0,326 | Protein arginine N-methyltransferase that exhibits septin and Hsl1p-dependent bud neck localization and periodic Hsl1p-dependent phosphorylation; required along with Hsl1p for bud neck recruitment, phosphorylation, and degradation of Swe1p | bud neck                         | Verified        | Homodiploid |                    | HU, Camptothecin |         |
| YIL091C | YIL091C | 3,739 | 0,015 | 2,341 | 0,046 | -2,306 | 0,029 | -2,664 | 0,002 | Nucleolar protein of unknown function; proposed to function as an RNA helicase based on structure prediction and remote homology searches; Essential for viability                                                                              | nuclolus                         | Uncharacterized | Essential   |                    |                  |         |
| YBR031W | RPL4A   | 5,104 | 0,027 | 2,340 | 0,077 | -3,843 | 0,007 | -0,970 | 0,005 | N-terminally acetylated protein component of the large (60S) ribosomal subunit, nearly identical to Rpl4Bp and has similarity to E. coli L4 and rat L4 ribosomal proteins                                                                       | Endoplasmic Reticulum, cytoplasm | Verified        | Homodiploid |                    |                  | CCP     |
| YDR290W | YDR290W | 3,681 | 0,055 | 2,340 | 0,012 | -4,289 | 0,000 | -2,076 | 0,238 | Dubious open reading frame unlikely to encode a protein, based on available experimental and comparative sequence data; partially overlaps the verified ORF RTT103                                                                              | unknown                          | Dubious         | Homodiploid | CTF, ALF, CS, TE-T |                  |         |
| YDR283C | GCN2    | 2,644 | 0,070 | 2,339 | 0,099 | -4,297 | 0,000 | 0,250  | 0,084 | Protein kinase, phosphorylates the alpha-subunit of translation initiation factor eIF2 (Sui2p) in response to starvation; activated by uncharged tRNAs and the Gcn1p-Gcn20p complex                                                             | cytoplasm                        | Verified        | Homodiploid |                    |                  |         |
| YMR206W | YMR206W | 2,138 | 0,004 | 2,300 | 0,074 | -4,842 | 0,000 | -5,187 | 0,000 | Putative protein of unknown function; YMR206W is not an Essential gene                                                                                                                                                                          | unknown                          | Uncharacterized | Homodiploid |                    |                  |         |
| YJL174W | KRE9    | 2,557 | 0,077 | 2,254 | 0,084 | -4,358 | 0,002 | -4,594 | 0,000 | Glycoprotein involved in cell wall beta-glucan assembly; null mutation leads to severe growth defects, aberrant multibudded morphology, and mating defects                                                                                      | extracellular region             | Verified        | Essential   |                    |                  |         |
| YNL086W | YNL086W | 2,068 | 0,002 | 2,226 | 0,074 | -5,899 | 0,000 | -3,027 | 0,000 | Putative protein of unknown function; green fluorescent protein (GFP)-fusion protein localizes to endosomes                                                                                                                                     | endosome                         | Uncharacterized | Homodiploid | ALF                |                  |         |
| YBR014C | YBR014C | 5,785 | 0,049 | 2,212 | 0,090 | -4,085 | 0,000 | -3,609 | 0,000 | Cis-golgi localized monothiol glutaredoxin; more similar in activity to dithiol than other monothiol glutaredoxins; involved in the oxidative stress response; does not bind metal ions; functional overlap with GRX6                           | Golgi apparatus                  | Verified        | Homodiploid |                    |                  |         |
| YPR189W | SKI3    | 2,625 | 0,031 | 2,190 | 0,009 | -3,661 | 0,000 | -1,880 | 0,005 | Protein involved in exosome mediated 3' to 5' mRNA degradation and translation inhibition of non-poly(A) mRNAs; forms complex with Ski2p and Ski8p; required for repressing propagation of dsRNA viruses                                        | cytoplasm                        | Verified        | Homodiploid |                    |                  |         |
| YJL190C | RPS22A  | 3,241 | 0,001 | 2,182 | 0,041 | -6,099 | 0,000 | 0,053  | 0,706 | Protein component of the small (40S) ribosomal subunit; nearly identical to Rps22Bp and has similarity to E. coli S8 and rat S15a ribosomal proteins                                                                                            | cytoplasm                        | Verified        | Homodiploid | TE-T, TL           |                  | Benomyl |
| YBR278W | DPB3    | 2,286 | 0,000 | 2,158 | 0,053 | -6,370 | 0,000 | -0,174 | 0,568 | Third-largest subunit of DNA polymerase II (DNA polymerase epsilon), required to maintain fidelity of chromosomal replication and also for inheritance of telomeric silencing; mRNA abundance peaks at the G1/S boundary of the cell cycle      | nucleus                          | Verified        | Homodiploid | LOH, CM            |                  | SA      |

|                |                |       |       |       |       |        |       |        |       |                                                                                                                                                                                         |                       |                 |             |     |              |  |
|----------------|----------------|-------|-------|-------|-------|--------|-------|--------|-------|-----------------------------------------------------------------------------------------------------------------------------------------------------------------------------------------|-----------------------|-----------------|-------------|-----|--------------|--|
| <i>YML009C</i> | <i>MRPL39</i>  | 2,687 | 0,012 | 2,153 | 0,070 | -3,722 | 0,000 | -0,291 | 0,106 | Mitochondrial ribosomal protein of the large subunit                                                                                                                                    | mitochondrion         | Verified        | Homodiploid | ALF |              |  |
| <i>YOL163W</i> | <i>YOL163W</i> | 2,383 | 0,001 | 2,127 | 0,021 | -0,129 | 0,351 | -0,535 | 0,020 | Putative protein of unknown function; member of the Dal5p subfamily of the major facilitator family                                                                                     | membrane              | Uncharacterized | Homodiploid |     | Tirapazamine |  |
| <i>YGR119C</i> | <i>NUP57</i>   | 2,137 | 0,021 | 2,107 | 0,046 | -3,122 | 0,000 | -1,929 | 0,000 | Nucleoporin, Essential subunit of the nuclear pore complex (NPC), functions as the organizing center of an NPC subcomplex containing Nsp1p, Nup49p, Nup57p, and Nic96p                  | nucleus               | Verified        | Essential   |     |              |  |
| <i>YMR161W</i> | <i>HLJ1</i>    | 2,928 | 0,011 | 2,032 | 0,066 | -3,460 | 0,000 | -3,759 | 0,001 | Co-chaperone for Hsp40p, anchored in the ER membrane; with its homolog Hdj1p promotes ER-associated protein degradation (ERAD) of integral membrane substrates; similar to E. coli DnaJ | Endoplasmic Reticulum | Verified        | Homodiploid |     |              |  |

Strains with elevated SLM at CAN1 locus which mate with MATα or MATa, but slight if any SLM at URA3 locus, might be haploid

{{(LogRatio SLM CAN1 > 2) AND [(LogRatio cross with MATα > 1) OR (LogRatio cross with MATa > 1)] AND [LogRatio SLM URA3 < 2]}

| ORF            | Name        | SLM at <i>CAN1</i> locus |       | SLM at <i>URA3</i> locus |       | cross with <i>MATalpha</i> |       | cross with <i>MATa</i> |       | Description                                                                                                                                                                                                                                      | Localization                                               | Status   | Collection  | Instability phenotypes | Genotoxic stress sensitivity                    | Other genome related phenotypes |
|----------------|-------------|--------------------------|-------|--------------------------|-------|----------------------------|-------|------------------------|-------|--------------------------------------------------------------------------------------------------------------------------------------------------------------------------------------------------------------------------------------------------|------------------------------------------------------------|----------|-------------|------------------------|-------------------------------------------------|---------------------------------|
|                |             | LogR                     | p-val | LogR                     | p-val | LogR                       | p-val | LogR                   | p-val |                                                                                                                                                                                                                                                  |                                                            |          |             |                        |                                                 |                                 |
| <i>YHR191C</i> | <i>CTF8</i> | 13,475                   | 0,000 | -1,079                   | 0,749 | 4,959                      | 0,002 | -3,360                 | 0,001 | Subunit of a complex with Ctf18p that shares some subunits with Replication Factor C and is required for sister chromatid cohesion                                                                                                               | nucleus                                                    | Verified | Homodiploid | ALF, CM, CS, CSA, TL   | HU, MMS, Camptothecin, Bleomycin A2, Cisplatin, | SPO*, Benomyl                   |
| <i>YBR084W</i> | <i>MIS1</i> | 12,917                   | 0,000 | 1,421                    | 0,066 | 5,435                      | 0,000 | -3,569                 | 0,000 | Mitochondrial C1-tetrahydrofolate synthase, involved in interconversion between different oxidation states of tetrahydrofolate (THF); provides activities of formyl-THF synthetase, methenyl-THF cyclohydrolase, and methylene-THF dehydrogenase | mitochondrion                                              | Verified | Homodiploid |                        |                                                 |                                 |
| <i>YOR008C</i> | <i>SLG1</i> | 11,934                   | 0,000 | -0,905                   | 0,077 | 3,710                      | 0,000 | -4,594                 | 0,000 | Sensor-transducer of the stress-activated PKC1-MPK1 kinase pathway involved in maintenance of cell wall integrity; involved in organization of the actin cytoskeleton; secretory pathway Wsc1p is required for the arrest of secretion response  | bud neck, plasma membrane                                  | Verified | Homodiploid | RMCD                   | MMS                                             | CCP                             |
| <i>YPL262W</i> | <i>FUM1</i> | 8,833                    | 0,000 | 0,274                    | 0,070 | -3,781                     | 0,000 | 4,853                  | 0,001 | Fumarase, converts fumaric acid to L-malic acid in the TCA cycle; cytosolic and mitochondrial localization determined by the N-terminal mitochondrial targeting sequence and protein conformation; phosphorylated in mitochondria                | mitochondrion, cytoplasm                                   | Verified | Homodiploid | RMCD                   |                                                 |                                 |
| <i>YKL029C</i> | <i>MAE1</i> | 8,763                    | 0,002 | 1,448                    | 0,075 | -3,919                     | 0,000 | 2,607                  | 0,015 | Mitochondrial malic enzyme, catalyzes the oxidative decarboxylation of malate to pyruvate, which is a key intermediate in sugar metabolism and a precursor for synthesis of several amino acids                                                  | mitochondrion                                              | Verified | Homodiploid |                        |                                                 |                                 |
| <i>YJR033C</i> | <i>RAV1</i> | 7,792                    | 0,000 | 1,751                    | 0,097 | 4,951                      | 0,000 | -3,034                 | 0,000 | Subunit of the RAVE complex (Rav1p, Rav2p, Skp1p), which promotes assembly of the V-ATPase holoenzyme; required for transport between the early and late endosome/PVC and for localization of TGN membrane proteins; potential Cdc28p substrate  | vacuole                                                    | Verified | Homodiploid | RMCD                   | Doxorubicin, Metal                              |                                 |
| <i>YJR031C</i> | <i>GEA1</i> | 6,209                    | 0,003 | 0,169                    | 0,026 | 4,171                      | 0,000 | -1,743                 | 0,000 | Guanine nucleotide exchange factor for ADP ribosylation factors (ARFs), involved in vesicular transport between the Golgi and ER, Golgi organization, and actin cytoskeleton organization; similar to but not functionally redundant with Gea2p  | Golgi apparatus, Endoplasmic Reticulum, actin cytoskeleton | Verified | Homodiploid |                        |                                                 |                                 |
| <i>YDR247W</i> | <i>VHS1</i> | 6,020                    | 0,004 | 1,349                    | 0,045 | -3,165                     | 0,000 | 3,125                  | 0,009 | Cytoplasmic serine/threonine protein kinase; identified as a high-copy suppressor of the synthetic lethality of a sis2 sit4 double mutant, suggesting a role in G1/S phase progression; homolog of Sks1p                                         | cytoplasm                                                  | Verified | Homodiploid |                        |                                                 |                                 |

|                |                |       |       |        |       |        |       |        |       |                                                                                                                                                                                                                                            |                         |                 |             |                        |           |            |
|----------------|----------------|-------|-------|--------|-------|--------|-------|--------|-------|--------------------------------------------------------------------------------------------------------------------------------------------------------------------------------------------------------------------------------------------|-------------------------|-----------------|-------------|------------------------|-----------|------------|
| <i>YKR020W</i> | <i>VPS51</i>   | 3,437 | 0,054 | -0,256 | 0,088 | 3,912  | 0,000 | -2,335 | 0,002 | Component of the GARP (Golgi-associated retrograde protein) complex, Vps51p-Vps52p-Vps53p-Vps54p, which is required for the recycling of proteins from endosomes to the late Golgi; links the (VFT/GARP) complex to the SNARE Tlg1p        | Golgi apparatus         | Verified        | Homodiploid | RMCD                   | Metal     | SPO, ionic |
| <i>YBR236C</i> | <i>ABD1</i>    | 3,159 | 0,017 | 1,544  | 0,078 | 1,798  | 0,000 | -4,204 | 0,000 | Methyltransferase, catalyzes the transfer of a methyl group from S-adenosylmethionine to the GpppN terminus of capped mRNA                                                                                                                 | nucleus                 | Verified        | Essential   |                        |           |            |
| <i>YNR018W</i> | <i>YNR018W</i> | 2,601 | 0,036 | -0,658 | 0,028 | 1,056  | 0,008 | -0,571 | 0,008 | Putative protein of unknown function; non-tagged protein is detected in purified mitochondria; null mutant displays decreased frequency of mitochondrial genome loss (petite formation) and severe growth defect in minimal glycerol media | mitochondrion           | Uncharacterized | Homodiploid |                        |           |            |
| <i>YAL022C</i> | <i>FUN26</i>   | 2,337 | 0,001 | -1,036 | 0,065 | 2,047  | 0,016 | -4,441 | 0,013 | Nucleoside transporter with broad nucleoside selectivity; localized to intracellular membranes                                                                                                                                             | intracellular membranes | Verified        | Homodiploid |                        | UVerified |            |
| <i>YDR466W</i> | <i>PKH3</i>    | 2,325 | 0,003 | 0,569  | 0,048 | 1,175  | 0,000 | -3,828 | 0,000 | Protein kinase with similarity to mammalian phosphoinositide-dependent kinase 1 (PDK1) and yeast Pkh1p and Pkh2p, two redundant upstream activators of Pkc1p; identified as a multicopy suppressor of a pkh1 pkh2 double mutant            | unknown                 | Verified        | Homodiploid |                        |           |            |
| <i>YBR107C</i> | <i>IML3</i>    | 2,307 | 0,007 | 0,089  | 0,049 | -3,289 | 0,000 | 1,295  | 0,005 | Protein with a role in kinetochore function, localizes to the outer kinetochore in a Ctf19p-dependent manner, interacts with Chl4p and Ctf19p                                                                                              | nucleus                 | Verified        | Homodiploid | BIM, CTF, ALF, CS, CSA |           |            |
| <i>YML036W</i> | <i>CGI121</i>  | 2,238 | 0,067 | 1,907  | 0,006 | -1,934 | 0,035 | 2,539  | 0,029 | Protein involved in telomere uncapping and elongation as component of the KEOPS protein complex with Bud32p, Kae1p, Pcc1p, and Gon7p; also shown to be a component of the EKC protein complex; homolog of human CGI-121                    | nucleus                 | Verified        | Homodiploid |                        |           |            |
| <i>YGR078C</i> | <i>PAC10</i>   | 2,213 | 0,060 | 0,358  | 0,013 | 1,284  | 0,001 | -3,733 | 0,002 | Part of the heteromeric co-chaperone GimC/prefoldin complex, which promotes efficient protein folding                                                                                                                                      | cytoplasm               | Verified        | Homodiploid | BIM, ALF, CM, CSA, MR  | HU        | Benomyl    |
| <i>YOL079W</i> | <i>YOL079W</i> | 2,040 | 0,003 | 0,195  | 0,086 | -4,010 | 0,000 | 1,570  | 0,000 | Dubious open reading frame unlikely to encode a functional protein, based on available experimental and comparative sequence data                                                                                                          | unknown                 | Dubious         | Homodiploid |                        |           |            |

Strains with elevated SLM at URA3 locus which mate with MAT $\alpha$  or MATa, but slight if any SLM at CAN1 locus

{{(LogRatio SLM URA3 > 2) AND [(LogRatio cross with MAT $\alpha$  > 1) OR (LogRatio cross with MATa > 1)] AND [LogRatio SLM CAN1 < 2]}

| ORF            | Name           | SLM at <i>CAN1</i> locus |       | SLM at <i>URA3</i> locus |       | cross with MAT $\alpha$ |       | cross with MATa |       | Description                                                                                                                                                                                                                            | Localization          | Status          | Collection  | Instability phenotypes | Genotoxic stress sensitivity | Other genome related phenotypes |
|----------------|----------------|--------------------------|-------|--------------------------|-------|-------------------------|-------|-----------------|-------|----------------------------------------------------------------------------------------------------------------------------------------------------------------------------------------------------------------------------------------|-----------------------|-----------------|-------------|------------------------|------------------------------|---------------------------------|
|                |                | LogR                     | p-val | LogR                     | p-val | LogR                    | p-val | LogR            | p-val |                                                                                                                                                                                                                                        |                       |                 |             |                        |                              |                                 |
| <i>YML086C</i> | <i>ALO1</i>    | 0,802                    | 0,002 | 6,329                    | 0,021 | -4,198                  | 0,000 | 1,075           | 0,002 | D-Arabinono-1,4-lactone oxidase, catalyzes the final step in biosynthesis of D-erythroascorbic acid, which is protective against oxidative stress                                                                                      | mitochondrion         | Verified        | Homodiploid | GCR                    | OXY                          | CCP                             |
| <i>YML126C</i> | <i>ERG13</i>   | 1,151                    | 0,016 | 5,564                    | 0,046 | 1,142                   | 0,000 | -1,538          | 0,001 | 3-hydroxy-3-methylglutaryl-CoA (HMG-CoA) synthase, catalyzes the formation of HMG-CoA from acetyl-CoA and acetoacetyl-CoA; involved in the second step in mevalonate biosynthesis                                                      | Endoplasmic Reticulum | Verified        | Essential   |                        |                              |                                 |
| <i>YIR029W</i> | <i>DAL2</i>    | -0,071                   | 0,000 | 5,546                    | 0,045 | 1,028                   | 0,004 | -0,819          | 0,014 | Allantoicase, converts allantoate to urea and ureidoglycolate in the second step of allantoin degradation; expression sensitive to nitrogen catabolite repression and induced by allophanate, an intermediate in allantoin degradation | unknown               | Verified        | Homodiploid |                        |                              |                                 |
| <i>YJL016W</i> | <i>YJL016W</i> | 0,842                    | 0,013 | 5,074                    | 0,002 | -5,780                  | 0,002 | 2,034           | 0,001 | Putative protein of unknown function; GFP-fusion protein localizes to the cytoplasm; conserved in closely related <i>Saccharomyces</i> species                                                                                         | cytoplasm             | Uncharacterized | Homodiploid |                        |                              |                                 |
| <i>YIL057C</i> | <i>YIL057C</i> | -0,240                   | 0,010 | 5,049                    | 0,017 | 1,649                   | 0,000 | -0,937          | 0,011 | Putative protein of unknown function; expression induced under carbon limitation and repressed under high glucose                                                                                                                      | unknown               | Uncharacterized | Homodiploid |                        |                              |                                 |



|           |           |        |       |       |       |        |       |        |       |                                                                                                                                                                                                                                                |                                        |                 |             |      |           |         |
|-----------|-----------|--------|-------|-------|-------|--------|-------|--------|-------|------------------------------------------------------------------------------------------------------------------------------------------------------------------------------------------------------------------------------------------------|----------------------------------------|-----------------|-------------|------|-----------|---------|
| YDR209C   | YDR209C   | -0,349 | 0,001 | 4,854 | 0,034 | -5,481 | 0,000 | 1,368  | 0,020 | Dubious open reading frame unlikely to encode a protein, based on available experimental and comparative sequence data; partially overlaps uncharacterized gene YDR210W.                                                                       | unknown                                | Dubious         | Homodiploid |      |           |         |
| YGR081C   | SLX9      | 1,239  | 0,006 | 4,238 | 0,087 | 2,385  | 0,000 | -0,942 | 0,047 | Protein required for pre-rRNA processing; associated with the 90S pre-ribosome and 43S small ribosomal subunit precursor; interacts with U3 snoRNA; deletion mutant has synthetic fitness defect with an sgs1 deletion mutant                  | nucleolus                              | Verified        | Homodiploid |      |           | NT      |
| YBL067C   | UBP13     | 1,054  | 0,015 | 4,069 | 0,042 | 3,493  | 0,000 | 2,648  | 0,000 | Putative ubiquitin carboxyl-terminal hydrolase, ubiquitin-specific protease that cleaves ubiquitin-protein fusions                                                                                                                             | unknown                                | Verified        | Homodiploid |      |           |         |
| YLR390W-A | CCW14     | 0,317  | 0,006 | 3,865 | 0,057 | 1,798  | 0,000 | -0,535 | 0,052 | Covalently linked cell wall glycoprotein, present in the inner layer of the cell wall                                                                                                                                                          | cell wall                              | Verified        | Homodiploid | TL   |           |         |
| YJR034W   | PET191    | 1,204  | 0,017 | 3,852 | 0,084 | 1,472  | 0,004 | -3,139 | 0,016 | Protein required for assembly of cytochrome c oxidase; exists as an oligomer that is integral to the mitochondrial inner membrane and faces the intermembrane space; contains a twin Cx9C motif                                                | mitochondrion                          | Verified        | Homodiploid | RMCD |           |         |
| YOR139C   | YOR139C   | 0,279  | 0,025 | 3,848 | 0,000 | -2,795 | 0,005 | 2,585  | 0,013 | Dubious open reading frame unlikely to encode a protein, based on available experimental and comparative sequence data; partially overlaps the verified ORF SFL1/YOR140W                                                                       | unknown                                | Dubious         | Homodiploid |      |           | Benomyl |
| YDR237W   | MRPL7     | 0,729  | 0,073 | 3,839 | 0,032 | 1,561  | 0,000 | -0,759 | 0,057 | Mitochondrial ribosomal protein of the large subunit                                                                                                                                                                                           | mitochondrion                          | Verified        | Homodiploid |      | MMS       |         |
| YIL023C   | YKE4      | -0,740 | 0,004 | 3,731 | 0,020 | 1,340  | 0,000 | 0,296  | 0,050 | Zinc transporter; localizes to the ER; null mutant is sensitive to calcofluor white, leads to zinc accumulation in cytosol; ortholog of the mouse KE4 and member of the ZIP (ZRT, IRT-like Protein) family                                     | Endoplasmic Reticulum                  | Verified        | Homodiploid |      |           |         |
| YPR083W   | MDM36     | 0,317  | 0,002 | 3,651 | 0,097 | -3,430 | 0,000 | 1,589  | 0,000 | Protein required for normal mitochondrial morphology and inheritance                                                                                                                                                                           | unknown                                | Verified        | Homodiploid | RMCD |           |         |
| YLR193C   | UPS1      | 1,014  | 0,027 | 3,636 | 0,053 | 5,847  | 0,000 | 5,505  | 0,000 | Mitochondrial intermembrane space protein that regulates alternative processing and sorting of Mgm1p and other proteins; required for normal mitochondrial morphology; ortholog of human PRELI                                                 | mitochondrion                          | Verified        | Homodiploid |      |           |         |
| YOR083W   | WHI5      | -0,129 | 0,001 | 3,547 | 0,023 | 2,657  | 0,000 | -3,938 | 0,000 | Repressor of G1 transcription that binds to SCB binding factor (SBF) at SCB target promoters in early G1; phosphorylation of Whi5p by the CDK, Cln3p/Cdc28p relieves repression and promoter binding by Whi5; periodically expressed in G1     | nucleus                                | Verified        | Homodiploid | CM   | UVerified |         |
| YDR175C   | RSM24     | 1,894  | 0,050 | 3,419 | 0,029 | 1,816  | 0,000 | -2,191 | 0,001 | Mitochondrial ribosomal protein of the small subunit                                                                                                                                                                                           | mitochondrion                          | Verified        | Homodiploid | mtGM |           | Benomyl |
| YBR251W   | MRPS5     | -2,157 | 0,059 | 3,409 | 0,032 | 1,928  | 0,000 | -1,820 | 0,000 | Mitochondrial ribosomal protein of the small subunit                                                                                                                                                                                           | mitochondrion                          | Verified        | Homodiploid |      |           |         |
| YJR016C   | ILV3      | -0,578 | 0,025 | 3,393 | 0,014 | 1,219  | 0,064 | -3,364 | 0,017 | Dihydroxyacid dehydratase, catalyzes third step in the common pathway leading to biosynthesis of branched-chain amino acids                                                                                                                    | mitochondrion                          | Verified        | Essential   |      |           |         |
| YML131W   | YML131W   | -0,237 | 0,004 | 3,356 | 0,058 | -4,344 | 0,000 | 2,116  | 0,000 | Putative protein of unknown function with similarity to medium chain dehydrogenase/reductases; expression induced by stresses including osmotic shock, DNA damaging agents, and other chemicals; GFP-fusion protein localizes to the cytoplasm | cytoplasm                              | Uncharacterized | Homodiploid |      |           |         |
| YER067C-A | YER067C-A | 0,968  | 0,001 | 3,283 | 0,013 | 1,072  | 0,000 | -1,004 | 0,005 | Dubious open reading frame unlikely to encode a protein, based on available experimental and comparative sequence data; partially overlaps the uncharacterized ORF YER067W                                                                     | unknown                                | Dubious         | Homodiploid |      |           |         |
| YDR462W   | MRPL28    | 0,311  | 0,089 | 3,228 | 0,037 | 1,812  | 0,015 | -1,749 | 0,017 | Mitochondrial ribosomal protein of the large subunit                                                                                                                                                                                           | mitochondrion                          | Verified        | Homodiploid |      |           | Benomyl |
| YFL027C   | GYP8      | -0,868 | 0,001 | 3,170 | 0,009 | -3,446 | 0,000 | 2,203  | 0,000 | GTPase-activating protein for yeast Rab family members; Ypt1p is the preferred in vitro substrate but also acts on Sec4p, Ypt31p and Ypt32p; involved in the regulation of ER to Golgi vesicle transport                                       | Endoplasmic Reticulum, Golgi apparatus | Verified        | Homodiploid |      |           |         |

|           |         |        |       |       |       |        |       |        |       |                                                                                                                                                                                                                                             |                                  |                 |             |                      |                           |              |
|-----------|---------|--------|-------|-------|-------|--------|-------|--------|-------|---------------------------------------------------------------------------------------------------------------------------------------------------------------------------------------------------------------------------------------------|----------------------------------|-----------------|-------------|----------------------|---------------------------|--------------|
| YPR179C   | HDA3    | -0,177 | 0,000 | 3,157 | 0,002 | 1,592  | 0,000 | -4,925 | 0,000 | Subunit of a possibly tetrameric trichostatin A-sensitive class II histone deacetylase complex that contains an Hda1p homodimer and an Hda2p-Hda3p heterodimer; required for the activity of the complex; has similarity to Hda2p           | nucleus                          | Verified        | Homodiploid |                      |                           | SA           |
| YBL091C-A | SCS22   | 0,119  | 0,000 | 3,134 | 0,041 | 1,278  | 0,000 | -5,210 | 0,000 | Protein involved in regulation of phospholipid metabolism; homolog of Scs2p; similar to D. melanogaster inturnd protein                                                                                                                     | unknown                          | Verified        | Homodiploid |                      |                           |              |
| YBL038W   | MRPL16  | 1,880  | 0,092 | 3,098 | 0,016 | -1,947 | 0,000 | 2,016  | 0,000 | Mitochondrial ribosomal protein of the large subunit                                                                                                                                                                                        | mitochondrion                    | Verified        | Homodiploid |                      | UVerified                 |              |
| YML090W   | YML090W | -0,103 | 0,049 | 3,054 | 0,008 | 4,814  | 0,000 | -4,042 | 0,000 | Dubious open reading frame unlikely to encode a protein, based on available experimental and comparative sequence data; partially overlaps the dubious ORF YML089C; exhibits growth defect on a non-fermentable (respiratory) carbon source | unknown                          | Dubious         | Homodiploid | ALF                  |                           |              |
| YHR034C   | PIH1    | -1,704 | 0,044 | 3,038 | 0,001 | 4,772  | 0,000 | -1,781 | 0,013 | Protein of unresolved function; may function in protein folding and/or rRNA processing, interacts with a chaperone (Hsp82p), two chromatin remodeling factors (Rvb1p, Rvb2p) and two rRNA processing factors (Rrp43p, Nop58p)               | nucleus, cytoplasm               | Verified        | Homodiploid |                      |                           |              |
| YJR053W   | BFA1    | 1,579  | 0,005 | 3,020 | 0,056 | 2,773  | 0,000 | -2,402 | 0,000 | Component of the GTPase-activating Bfa1p-Bub2p complex involved in multiple cell cycle checkpoint pathways that control exit from mitosis                                                                                                   | Spindle Pole Body                | Verified        | Homodiploid | ALF                  |                           | Benomyl, CCP |
| YAR047C   | YAR047C | 1,647  | 0,001 | 3,007 | 0,005 | 3,219  | 0,002 | -1,224 | 0,028 | Dubious open reading frame unlikely to encode a protein, based on available experimental and comparative sequence data                                                                                                                      | unknown                          | Dubious         | Homodiploid |                      |                           |              |
| YLR414C   | YLR414C | -0,001 | 0,058 | 3,004 | 0,048 | -4,964 | 0,000 | 2,092  | 0,000 | Putative protein of unknown function; green fluorescent protein (GFP)-fusion protein localizes to the bud and cytoplasm; Hog1p is required for transcriptional induction in response to cell wall damage; YLR414C is not an Essential gene  | bud, cytoplasm                   | Uncharacterized | Homodiploid |                      |                           |              |
| YMR072W   | ABF2    | 1,395  | 0,084 | 2,982 | 0,009 | 1,017  | 0,000 | -1,085 | 0,003 | Mitochondrial DNA-binding protein involved in mitochondrial DNA replication and recombination, member of HMG1 DNA-binding protein family; activity may be regulated by protein kinase A phosphorylation                                     | mitochondrion                    | Verified        | Homodiploid | mtGM                 |                           | CCP          |
| YNL111C   | CYB5    | 0,858  | 0,022 | 2,982 | 0,035 | -2,622 | 0,006 | 3,763  | 0,001 | Cytochrome b5, involved in the sterol and lipid biosynthesis pathways; acts as an electron donor to support sterol C5-6 desaturation                                                                                                        | Endoplasmic Reticulum, microsome | Verified        | Homodiploid |                      | HU                        |              |
| YMR228W   | MTF1    | -0,226 | 0,001 | 2,973 | 0,035 | 1,638  | 0,000 | -5,192 | 0,000 | Mitochondrial RNA polymerase specificity factor with structural similarity to S-adenosylmethionine-dependent methyltransferases and functional similarity to bacterial sigma-factors, interacts with mitochondrial core polymerase Rpo41p   | mitochondrion                    | Verified        | Homodiploid | mtGM                 | UVerified                 |              |
| YNL140C   | YNL140C | 1,462  | 0,010 | 2,965 | 0,049 | -4,458 | 0,000 | 1,544  | 0,000 | Dubious open reading frame unlikely to encode a protein, based on available experimental and comparative sequence data; partially overlaps the verified gene RLR1/YNL139C                                                                   | unknown                          | Dubious         | Homodiploid | CTF, ALF, CS         | Doxorubicin, Metal        |              |
| YPL194W   | DDC1    | 1,530  | 0,050 | 2,944 | 0,008 | -2,307 | 0,011 | 3,184  | 0,000 | DNA damage checkpoint protein, part of a PCNA-like complex required for DNA damage response, required for pachytene checkpoint to inhibit cell cycle in response to unrepaired recombination intermediates; potential Cdc28p substrate      | nucleus                          | Verified        | Homodiploid | BIM, CTF, CS, MR, MF | HU, MMS, γR, Camptothecin |              |
| YNL001W   | DOM34   | 0,422  | 0,003 | 2,899 | 0,034 | 1,717  | 0,000 | -4,603 | 0,001 | Endoribonuclease; functions in no-go mRNA decay, protein translation to promote G1 progression and differentiation, required for meiotic cell division; similar to the eukaryotic Pelota                                                    | cytoplasm                        | Verified        | Homodiploid |                      |                           | SPO, ionic   |
| YMR279C   | YMR279C | -0,626 | 0,001 | 2,818 | 0,021 | 1,032  | 0,000 | 1,786  | 0,000 | Putative protein of unknown function; identified as a heat-induced gene in a high-throughout screen; YMR279C is not an Essential gene                                                                                                       | unknown                          | Uncharacterized | Homodiploid |                      |                           |              |

|         |         |        |       |       |       |        |       |        |       |                                                                                                                                                                                                                                               |                                        |                 |             |                       |                                      |  |
|---------|---------|--------|-------|-------|-------|--------|-------|--------|-------|-----------------------------------------------------------------------------------------------------------------------------------------------------------------------------------------------------------------------------------------------|----------------------------------------|-----------------|-------------|-----------------------|--------------------------------------|--|
| YER055C | HIS1    | 1,632  | 0,000 | 2,807 | 0,073 | 4,812  | 0,000 | -3,677 | 0,000 | ATP phosphoribosyltransferase, a hexameric enzyme, catalyzes the first step in histidine biosynthesis; mutations cause histidine auxotrophy and sensitivity to Cu, Co, and Ni salts; transcription is regulated by general amino acid control | intracellular                          | Verified        | Homodiploid |                       | Metal                                |  |
| YLR037C | DAN2    | 1,995  | 0,042 | 2,789 | 0,091 | -4,553 | 0,000 | 1,769  | 0,000 | Cell wall mannoprotein with similarity to Tir1p, Tir2p, Tir3p, and Tir4p; expressed under anaerobic conditions, completely repressed during aerobic growth                                                                                    | cell wall                              | Verified        | Homodiploid |                       |                                      |  |
| YER173W | RAD24   | -0,292 | 0,049 | 2,779 | 0,017 | 1,003  | 0,001 | -5,199 | 0,001 | Checkpoint protein, involved in the activation of the DNA damage and meiotic pachytene checkpoints; subunit of a clamp loader that loads Rad17p-Mec3p-Ddc1p onto DNA; homolog of human and S. pombe Rad17 protein                             | nucleus                                | Verified        | Homodiploid | BIM, ALF, GCR, CM, MF | HU, MMS, γR, UVerified, Camptothecin |  |
| YKR010C | TOF2    | 0,294  | 0,000 | 2,766 | 0,019 | 1,137  | 0,001 | -4,446 | 0,000 | Protein required for rDNA silencing and nucleolar segregation during mitosis; stimulates Cdc14p phosphatase activity; identified as a topoisomerase I (Top1p) binding protein; displays synthetic genetic interactions with TOP1 and HPR1     | nucleus, mitochondrion                 | Verified        | Homodiploid |                       |                                      |  |
| YGR055W | MUP1    | 1,009  | 0,005 | 2,748 | 0,033 | 1,495  | 0,000 | -1,707 | 0,000 | High affinity methionine permease, integral membrane protein with 13 putative membrane-spanning regions; also involved in cysteine uptake                                                                                                     | membrane                               | Verified        | Homodiploid |                       | HU                                   |  |
| YBR197C | YBR197C | 0,999  | 0,003 | 2,742 | 0,100 | 1,432  | 0,000 | -0,850 | 0,005 | Putative protein of unknown function; green fluorescent protein (GFP)-fusion protein localizes to the cytoplasm and nucleus; YBR197C is not an Essential gene                                                                                 | nucleus, cytoplasm                     | Uncharacterized | Homodiploid |                       |                                      |  |
| YBR104W | YMC2    | 0,406  | 0,022 | 2,731 | 0,043 | 2,113  | 0,000 | -2,132 | 0,000 | Mitochondrial protein, putative inner membrane transporter with a role in oleate metabolism and glutamate biosynthesis; member of the mitochondrial carrier (MCF) family; has similarity with Ymc1p                                           | mitochondrion                          | Verified        | Homodiploid |                       | MMS                                  |  |
| YGR161C | RTS3    | -0,874 | 0,028 | 2,678 | 0,079 | 0,492  | 0,079 | 2,216  | 0,096 | Putative component of the protein phosphatase type 2A complex                                                                                                                                                                                 | nucleus, cytoplasm                     | Uncharacterized | Homodiploid | RMCD                  |                                      |  |
| YDR097C | MSH6    | -0,918 | 0,000 | 2,651 | 0,007 | 2,545  | 0,000 | -0,600 | 0,009 | Protein required for mismatch repair in mitosis and meiosis, forms a complex with Msh2p to repair both single-base & insertion-deletion mispairs; potentially phosphorylated by Cdc28p                                                        | nucleus                                | Verified        | Homodiploid | Can <sup>R</sup> , MF |                                      |  |
| YKR007W | MEH1    | 0,946  | 0,012 | 2,634 | 0,030 | -5,167 | 0,000 | 2,207  | 0,000 | Component of the EGO complex, which is involved in the regulation of microautophagy, and of the GSE complex, which is required for proper sorting of amino acid permease Gap1p; loss results in a defect in vacuolar acidification            | vacuole, endosome                      | Verified        | Homodiploid |                       |                                      |  |
| YLR109W | AHP1    | 0,067  | 0,045 | 2,632 | 0,036 | -2,864 | 0,000 | 2,362  | 0,003 | Thiol-specific peroxiredoxin, reduces hydroperoxides to protect against oxidative damage; function in vivo requires covalent conjugation to Urm1p                                                                                             | cytoplasm, plasma membrane             | Verified        | Homodiploid |                       | OXY                                  |  |
| YOR037W | CYC2    | 0,499  | 0,045 | 2,628 | 0,076 | 2,217  | 0,000 | -4,804 | 0,000 | Mitochondrial peripheral inner membrane protein, contains a FAD cofactor in a domain exposed in the intermembrane space; exhibits redox activity in vitro; likely participates in ligation of heme to acytochromes c and c1 (Cyc1p and Cyt1p) | mitochondrion                          | Verified        | Homodiploid |                       |                                      |  |
| YLR253W | YLR253W | -0,599 | 0,000 | 2,626 | 0,023 | -4,072 | 0,000 | 1,818  | 0,002 | Putative protein of unknown function; the authentic, non-tagged protein is detected in highly purified mitochondria in high-throughput studies; transcription is periodic during the metabolic cycle; YLR253W is not an Essential gene        | mitochondrion                          | Uncharacterized | Homodiploid |                       |                                      |  |
| YPL013C | MRPS16  | 1,288  | 0,028 | 2,620 | 0,040 | -4,584 | 0,000 | 1,199  | 0,001 | Mitochondrial ribosomal protein of the small subunit                                                                                                                                                                                          | mitochondrion                          | Verified        | Homodiploid |                       | OXY                                  |  |
| YDR407C | TRS120  | -0,785 | 0,004 | 2,566 | 0,009 | 2,982  | 0,000 | -3,396 | 0,001 | One of 10 subunits of the transport protein particle (TRAPP) complex of the cis-Golgi which mediates vesicle docking and fusion; involved in endoplasmic reticulum (ER) to Golgi membrane traffic                                             | Golgi apparatus, Endoplasmic Reticulum | Verified        | Essential   |                       |                                      |  |

|           |           |        |       |       |       |        |       |        |       |                                                                                                                                                                                                                                                 |                       |                 |             |      |                 |     |
|-----------|-----------|--------|-------|-------|-------|--------|-------|--------|-------|-------------------------------------------------------------------------------------------------------------------------------------------------------------------------------------------------------------------------------------------------|-----------------------|-----------------|-------------|------|-----------------|-----|
| YIR001C   | SGN1      | -0,875 | 0,008 | 2,563 | 0,004 | 1,057  | 0,001 | -2,723 | 0,000 | Cytoplasmic RNA-binding protein, contains an RNA recognition motif (RRM); may have a role in mRNA translation, as suggested by genetic interactions with genes encoding proteins involved in translational initiation                           | cytoplasm             | Verified        | Homodiploid | RMCD |                 | CCP |
| YJR091C   | JSN1      | -1,487 | 0,000 | 2,515 | 0,072 | 1,783  | 0,000 | -4,129 | 0,000 | Member of the Puf family of RNA-binding proteins, interacts with mRNAs encoding membrane-associated proteins; overexpression suppresses a tub2-150 mutation and causes increased sensitivity to benomyl in wild-type cells                      | mitochondrion         | Verified        | Homodiploid |      |                 |     |
| YLR187W   | SKG3      | 0,681  | 0,001 | 2,465 | 0,001 | 3,030  | 0,000 | -1,035 | 0,001 | Protein of unknown function; green fluorescent protein (GFP)-fusion protein localizes to the cell periphery, cytoplasm, bud, and bud neck; potential Cdc28p substrate; similar to Caf120p and Skg4p                                             | bud, cytoplasm        | Uncharacterized | Homodiploid |      |                 |     |
| YOR162C   | YRR1      | 0,861  | 0,010 | 2,460 | 0,089 | 1,384  | 0,000 | -4,589 | 0,002 | Zn2-Cys6 zinc-finger transcription factor that activates genes involved in multidrug resistance; paralog of Yrm1p, acting on an overlapping set of target genes                                                                                 | nucleus               | Verified        | Homodiploid |      |                 |     |
| YIL001W   | YIL001W   | 1,840  | 0,010 | 2,384 | 0,008 | -4,450 | 0,000 | 2,468  | 0,000 | Putative protein of unknown function; contains a BTB/POZ domain which generally function in protein interactions; deletion slightly improved competitive fitness in rich media; GFP-tagged protein is localized to the cytoplasm                | cytoplasm             | Uncharacterized | Homodiploid |      |                 |     |
| YOR304C-A | YOR304C-A | -0,560 | 0,000 | 2,316 | 0,049 | 1,503  | 0,000 | -3,433 | 0,001 | Protein of unknown function; green fluorescent protein (GFP)-fusion protein localizes to the cell periphery, cytoplasm, bud, and bud neck                                                                                                       | bud, cytoplasm        | Uncharacterized | Homodiploid |      |                 |     |
| YDR079W   | PET100    | 0,548  | 0,026 | 2,316 | 0,021 | 3,042  | 0,000 | -3,921 | 0,001 | Chaperone that specifically facilitates the assembly of cytochrome c oxidase, integral to the mitochondrial inner membrane; interacts with a subcomplex of subunits VII, VIIa, and VIII (Cox7p, Cox9p, and Cox8p) but not with the holoenzyme   | mitochondrion         | Verified        | Homodiploid | mtGM | OXY, Metal      |     |
| YMR175W   | SIP18     | 1,322  | 0,001 | 2,303 | 0,044 | -4,651 | 0,001 | 1,524  | 0,007 | Protein of unknown function whose expression is induced by osmotic stress                                                                                                                                                                       | soluble fraction      | Verified        | Homodiploid |      |                 |     |
| YML117W   | NAB6      | -0,930 | 0,001 | 2,265 | 0,010 | -3,054 | 0,006 | 3,898  | 0,004 | Putative RNA-binding protein, based on computational analysis of large-scale protein-protein interaction data                                                                                                                                   | unknown               | Verified        | Homodiploid |      | γR, Doxorubicin |     |
| YFL033C   | RIM15     | 0,206  | 0,001 | 2,237 | 0,015 | -4,726 | 0,000 | 2,444  | 0,000 | Glucose-repressible protein kinase involved in signal transduction during cell proliferation in response to nutrients, specifically the establishment of stationary phase; identified as a regulator of IME2; substrate of Pho80p-Pho85p kinase | nucleus, cytoplasm    | Verified        | Homodiploid |      |                 | SPO |
| YNL046W   | YNL046W   | -0,133 | 0,000 | 2,209 | 0,008 | 1,832  | 0,018 | -4,019 | 0,000 | Putative protein of unknown function; expression depends on Swi5p; GFP-fusion protein localizes to the endoplasmic reticulum; deletion confers sensitivity to 4-(N-(S-glutathionylacetyl)amino) phenylarsenoxide (GSAO)                         | Endoplasmic Reticulum | Uncharacterized | Homodiploid |      |                 |     |
| YBR300C   | YBR300C   | 1,378  | 0,005 | 2,156 | 0,073 | 1,991  | 0,000 | -1,029 | 0,010 | Dubious open reading frame unlikely to encode a protein, based on available experimental and comparative sequence data; partially overlaps the verified gene YBR301W; YBR300C is not an Essential gene                                          | unknown               | Dubious         | Homodiploid |      |                 |     |
| YBR244W   | GPX2      | -0,545 | 0,036 | 2,116 | 0,026 | 5,742  | 0,000 | -4,306 | 0,000 | Phospholipid hydroperoxide glutathione peroxidase induced by glucose starvation that protects cells from phospholipid hydroperoxides and nonphospholipid peroxides during oxidative stress                                                      | nucleus, cytoplasm    | Verified        | Homodiploid | RMCD | γR              |     |
| YKR075C   | YKR075C   | -0,349 | 0,004 | 2,115 | 0,020 | -4,263 | 0,000 | 1,566  | 0,000 | Protein of unknown function; similar to YOR062Cp and Reg1p; expression regulated by glucose and Rgt1p; GFP-fusion protein is induced in response to the DNA-damaging agent MMS                                                                  | unknown               | Uncharacterized | Homodiploid |      |                 |     |
| YDR193W   | YDR193W   | -0,261 | 0,000 | 2,071 | 0,046 | 1,560  | 0,000 | -1,999 | 0,000 | Dubious open reading frame unlikely to encode a functional protein, based on available experimental and comparative sequence data                                                                                                               | unknown               | Dubious         | Homodiploid |      |                 |     |
| YLR312W-A | MRPL15    | 1,810  | 0,042 | 2,070 | 0,047 | 4,544  | 0,000 | -0,548 | 0,008 | Mitochondrial ribosomal protein of the large subunit                                                                                                                                                                                            | mitochondrion         | Verified        | Homodiploid |      |                 |     |



|                |              |        |       |       |       |        |       |        |       |                                                                                                                                                                                                                                                  |                                              |          |             |                  |                                                                 |  |
|----------------|--------------|--------|-------|-------|-------|--------|-------|--------|-------|--------------------------------------------------------------------------------------------------------------------------------------------------------------------------------------------------------------------------------------------------|----------------------------------------------|----------|-------------|------------------|-----------------------------------------------------------------|--|
| <i>YLL024C</i> | <i>SSA2</i>  | 0,842  | 0,001 | 2,047 | 0,046 | -4,631 | 0,000 | 1,921  | 0,000 | ATP binding protein involved in protein folding and vacuolar import of proteins; member of heat shock protein 70 (HSP70) family; associated with the chaperonin-containing T-complex; present in the cytoplasm, vacuolar membrane and cell wall  | cytoplasm, cell wall, vacuole, mitochondrion | Verified | Homodiploid |                  |                                                                 |  |
| <i>YDL059C</i> | <i>RAD59</i> | -0,018 | 0,006 | 2,036 | 0,005 | 1,440  | 0,000 | -0,876 | 0,003 | Protein involved in the repair of double-strand breaks in DNA during vegetative growth via recombination and single-strand annealing; anneals complementary single-stranded DNA; homologous to Rad52p                                            | nucleus                                      | Verified | Homodiploid | ALF, BIM, MR, MF | HU, MMS, Cisplatin, γR, Camptothecin, Doxorubicin, Tirapazamine |  |
| <i>YLR017W</i> | <i>MEU1</i>  | 0,655  | 0,001 | 2,014 | 0,036 | 1,450  | 0,000 | -2,010 | 0,004 | Methylthioadenosine phosphorylase (mitochondrionAP), catalyzes the initial step in the methionine salvage pathway; affects polyamine biosynthesis through regulation of ornithine decarboxylase (Spe1p) activity; regulates ADH2 gene expression | cytoplasm                                    | Verified | Homodiploid |                  |                                                                 |  |
| <i>YKR049C</i> | <i>FMP46</i> | -1,325 | 0,001 | 2,014 | 0,080 | 1,532  | 0,000 | -1,372 | 0,000 | Putative redox protein containing a thioredoxin fold; the authentic, non-tagged protein is detected in highly purified mitochondria in high-throughput studies                                                                                   | mitochondrion                                | Verified | Homodiploid |                  |                                                                 |  |
| <i>YLL001W</i> | <i>DNM1</i>  | -0,797 | 0,005 | 2,013 | 0,059 | 1,891  | 0,000 | -4,479 | 0,000 | Dynamin-related GTPase required for mitochondrial fission and the maintenance of mitochondrial morphology, assembles on the cytoplasmic face of mitochondrial tubules at sites at which division will occur; also participates in endocytosis    | mitochondrion, peroxisome                    | Verified | Homodiploid |                  |                                                                 |  |

\*this work

**Instability phenotypes (the genomic screens data):**

- ALF – A-like faker [Yuen et al.]
- BIM – diploid bimer [Yuen et al.]
- CTF – chromosome transmission fidelity [Yuen et al.; Smith,S. et al.]
- Can<sup>R</sup>- canavanine resistance [Huang et al., Smith,S. et al]
- GCR – gross chromosomal rearrangements [Smith,S. et al.; Myung, K. 2001; Myung, K. 2003]
- HAP – sensitivity to the mutagenic and toxic action of base analogs 6-hydroxylaminopurine [Stepchenkova,E.I. et al.]
- LOH – loss of heterozygosity [Andersen,M.P. et al.]
- RMCD - - restore mating competence to diploid [Kaeberlein,M et al.]

**Instability phenotypes (the SGD data):**

- CPM - chromosome maintenance decreased
- CS – colony sectoring
- CSA – chromosome segregation abnormal
- MF – mutation frequency increased
- MR - mitotic recombination increased
- mtGM - mitochondrial genome maintenance
- rho-MF – rho- mutation frequency
- TL – telomere length decreased
- TE-T - transposable element transposition increased

**Genotoxic stress sensitivity (SGD data):**

Bleomycin A2 – resistance to bleomycin A2 decreased

Camptothecin – resistance to camptothecin decreased

Cisplatin – resistance to cisplatin decreased

Doxorubicin - resistance to doxorubicin decreased

γR - gamma radiation resistance decreased

HU – resistance to hydroxyurea decreased

Metal – metal resistance decreased

MMS – resistance to methyl methanesulfonate decreased

OXY – oxidative stress resistance decreased

Phleomycin – resistance to phleomycin decreased

Tirapazamine - resistance to tirapazamine decreased

UV - UV resistance decreased

**Other genome related phenotypes**

Benomyl- gamma radiation resistance decreased

CCP – cell cycle progression

ionic – ionic stress resistance decreased

NT – nuclear transport

SA – silencing abnormal

SPO – sporulation efficiency decreased

Andersen,M.P., Nelson,Z.W., Hetrick,E.D. and Gottschling,D.E. (2008) A Genetic screen for increased loss of heterozygosity in *Saccharomyces cerevisiae*. Genetics, 179, 1179–1195.

Huang,M.E., Rio,A.G., Nicolas,A. and Kolodner,R.D. (2003) A genomewide screen in *Saccharomyces cerevisiae* for genes that suppress the accumulation of mutations. Proc. Natl. Acad. Sci. USA, 100, 11529–11534.

Kaeberlein,M., Kudlow,B.A., MacKay,V., Lockshon,D. and Kennedy,B.K. (2008) Single-gene deletions that restore mating competence to diploid yeast. FEMS Yeast Res., 8(2), 276–286.]

Myung,K., Datta,A., and Kolodner,R.D. (2001) Suppression of Spontaneous Chromosomal Rearrangements by S Phase Checkpoint Functions in *Saccharomyces cerevisiae*. Cell, 104, 397–408.

Myung,K., Pennaneach,V., Kats,E.S. and Kolodner,R.D. (2003) *Saccharomyces cerevisiae* chromatin-assembly factors that act during DNA replication function in the maintenance of genome stability. PNAS, 100, 6640–6645.

Smith,S., Hwang,J.Y., Banerjee,S., Majeed,A., Gupta,A., and Myung,K. (2004) Mutator genes for suppression of gross chromosomal rearrangements identified by a genome-wide screening in *Saccharomyces cerevisiae*. Proc. Natl. Acad. Sci. USA, 101, 9039-9044.

Stepchenkova,E.I., Kozmin,S.G, Alenin,V.V., and Pavlov,Y.I (2005) Genome-wide screening for genes whose deletions confer sensitivity to mutagenic purine base analogs in yeast. BMC Genetics, 6, 31

Yuen,K.W.Y., Warren,C.D., Chen,O., Kwok,T., Hieter,P. and Spencer,F.A. (2007) Systematic genome instability screens in yeast and their potential relevance to cancer. Proc. Natl. Acad. Sci. USA, 104, 3925–3930.
